# Supplementary material for: Transition from nematic to gyroid-type cubic soft self-assembly by side-chain engineering of π-conjugated sticky rods
Source: Royal Society of Chemistry journal article supplement (doi:10.1039/c7sm00793k), 2017-01-01
Supplement: c7sm00793k1.pdf [file c7sm00793k1.pdf]

## Supporting Information

### Transition from nematic to gyroid-type cubic soft self-assembly by side-chain engineering of $\pi$ -conjugated sticky rods

Marco Poppe,<sup>a</sup> Changlong Chen,<sup>b</sup> Helgard Ebert,<sup>a</sup> Silvio Poppe,<sup>a</sup> Marko Prehm,<sup>a</sup> Christoph Kerzig,<sup>a</sup> Feng Liu<sup>b</sup> and Carsten Tschierske<sup>a</sup>

<sup>a</sup> Institute of Chemistry, Martin-Luther University Halle-Wittenberg,  
Kurt-Mothes Str.2, D-06120 Halle/Saale, Germany.  
E-mail: carsten.tschierske@chemie.uni-halle.

<sup>b</sup> State Key Laboratory for Mechanical Behavior of Materials,  
Xi'an Jiaotong University, Xi'an 710049, P. R. China.  
E-mail: feng.liu@xjtu.edu.cn

# 1. Additional data

## 1.1 DSC traces

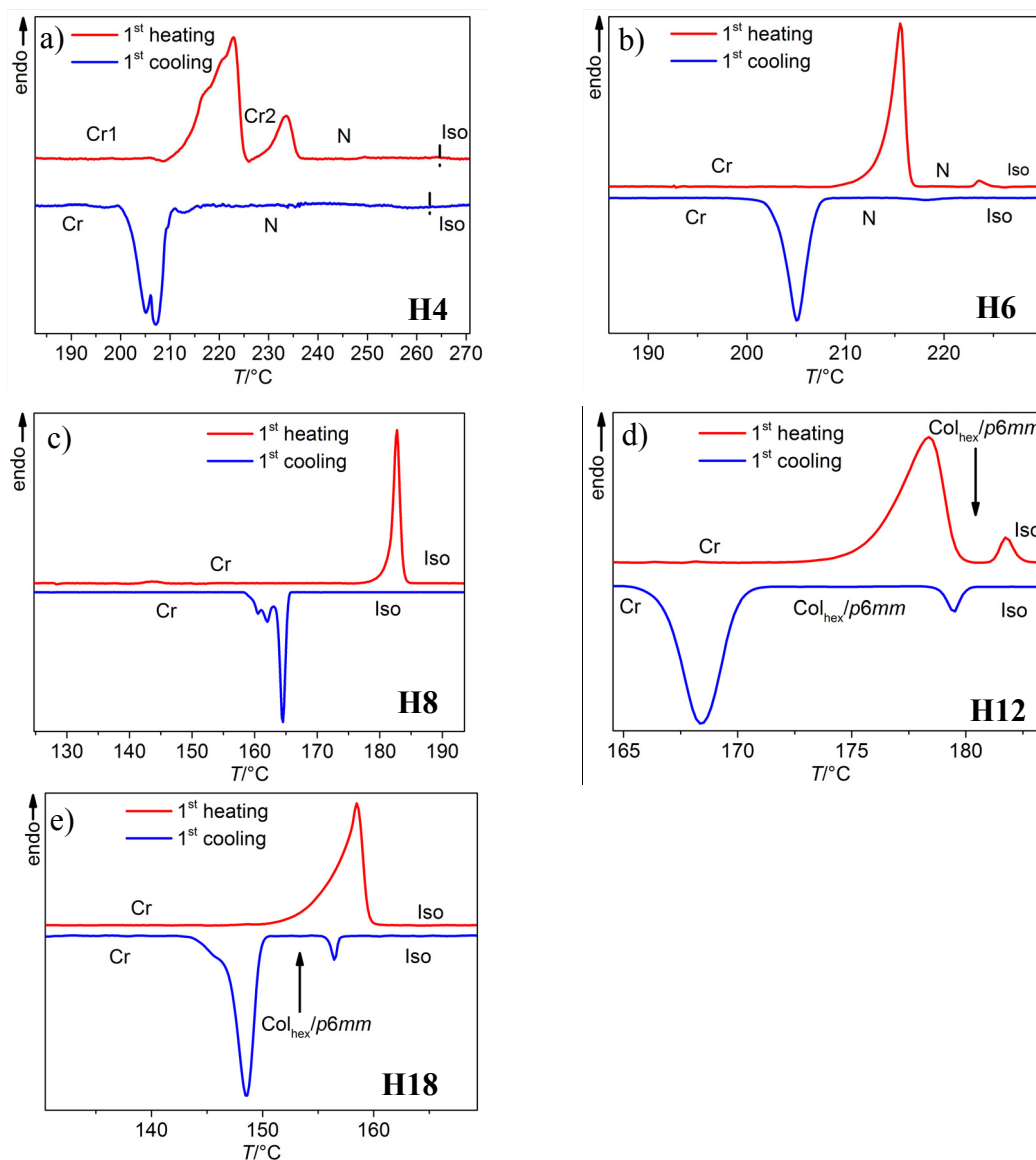

**Figure S1.** DSC heating and cooling traces of compounds: a) **H4**, b) **H6**, c) **H8**, d) **H12** and e) **H18**, recorded at 10 K·min<sup>-1</sup>.

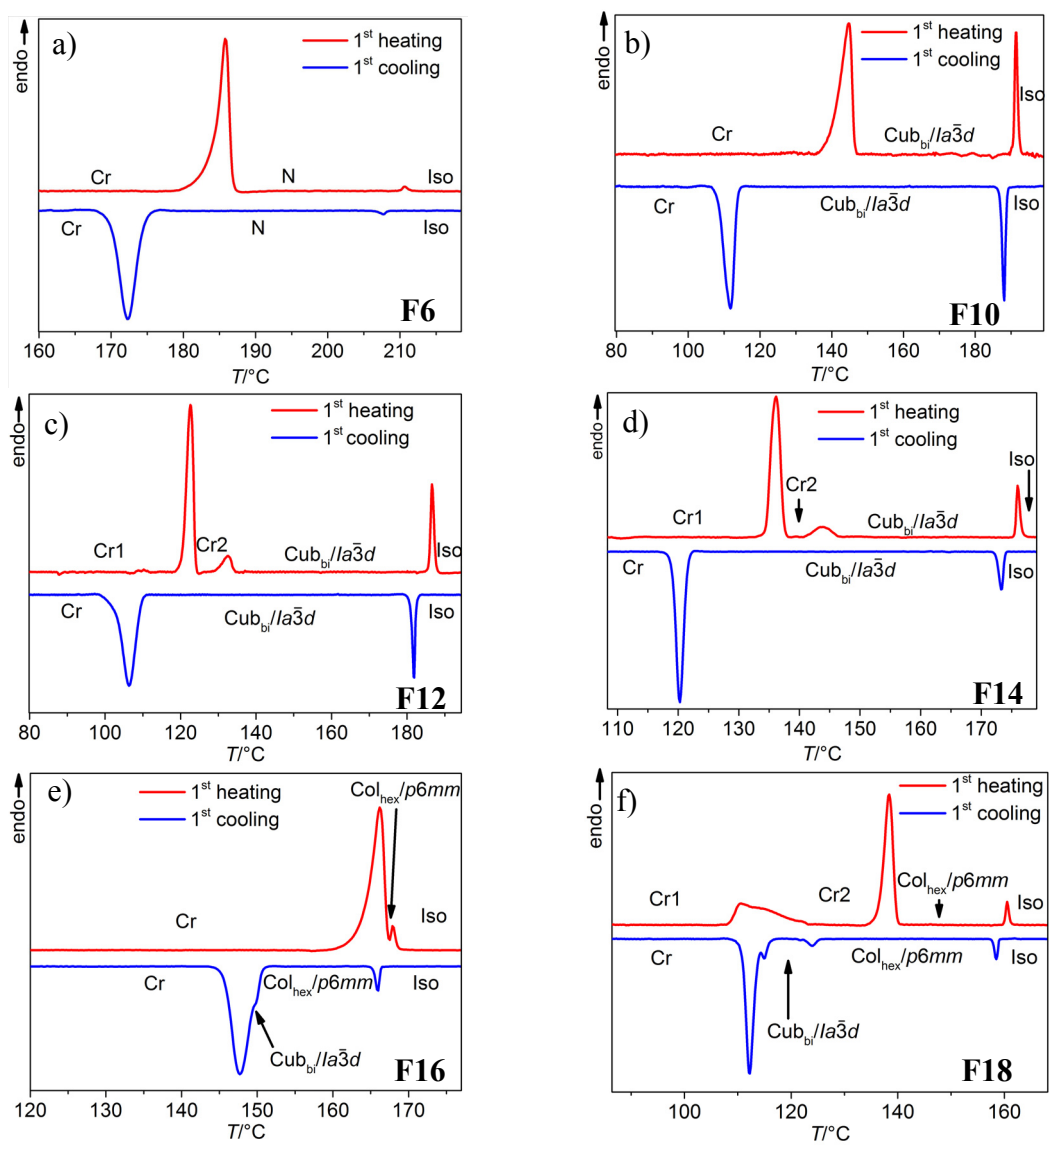

**Figure S2.** DSC heating and cooling traces of compounds: a) **F6**, b) **F10**, c) **F12**, d) **F14**, e) **F16** and f) **F18**, recorded at 10 K·min<sup>-1</sup>.

## 1.2 Additional textures

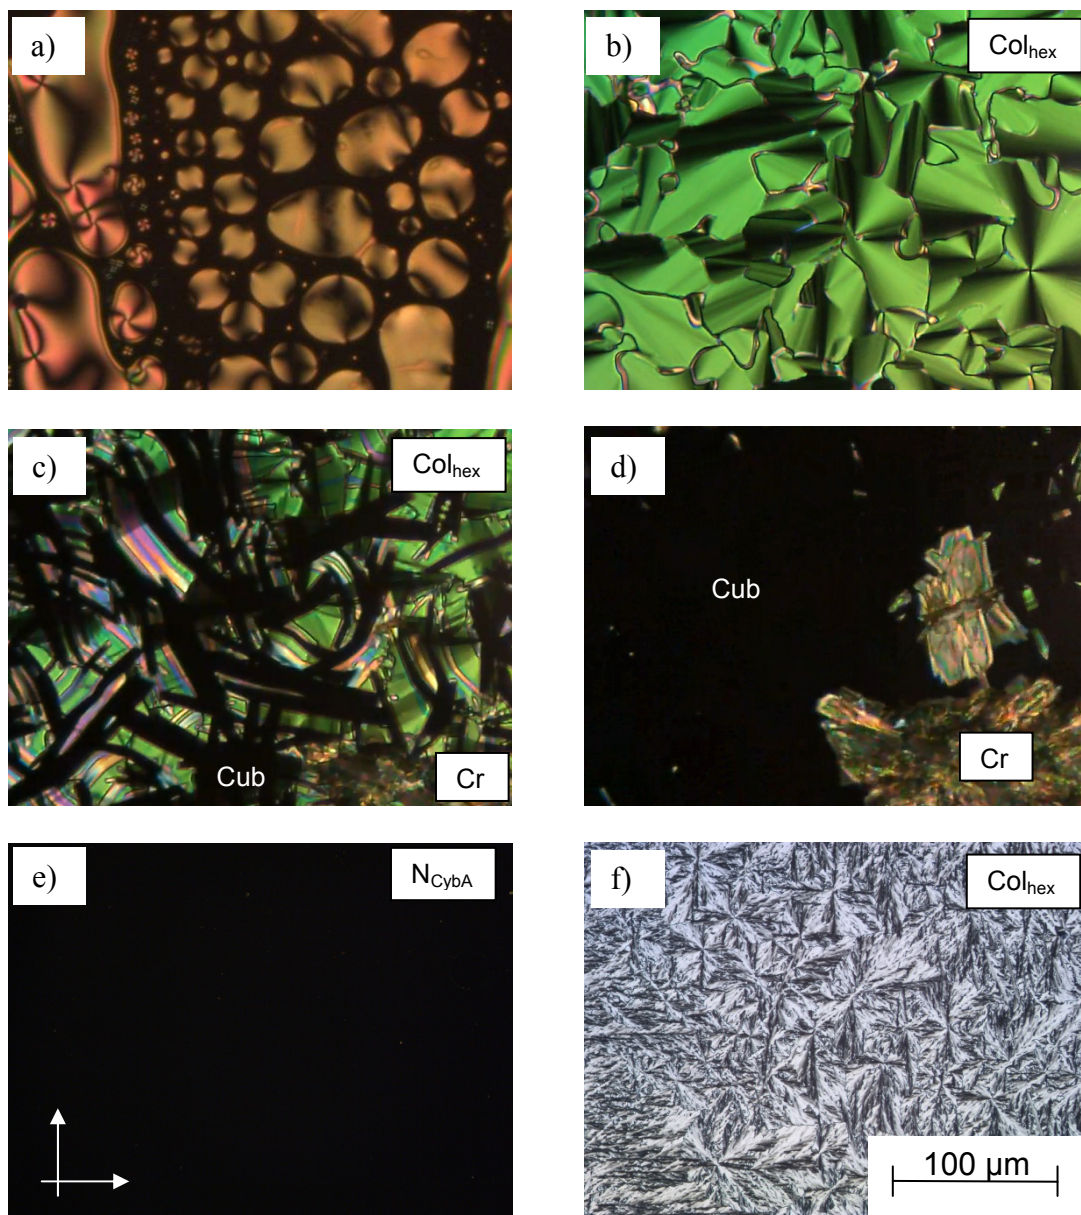

**Figure S3:** Selected textures of compounds **H<sub>n</sub>** as observed between crossed polarizers between non-treated microscopy slides: a) Iso-to- $N_{CybA}$  transition of **H4** at 262 °C, b-c) LC phases observed for **H8** on rapid cooling; b)  $Col_{hex}$  phase at  $T \sim 150$  °C; c) transition  $Col_{hex}$ - $Cub_{bi}$  at  $T \sim 140$ °C and d)  $Cub_{bi}$  phase with crystallization at  $T \sim 138$  °C, e) homeotropic  $N_{CybA}$  phase of **H6** at 200 °C and f)  $Col_{hex}$  phase of **H12** at 170 °C; arrows in e) indicate the orientation of polarizer and analyzer and the scale bar is given in f).

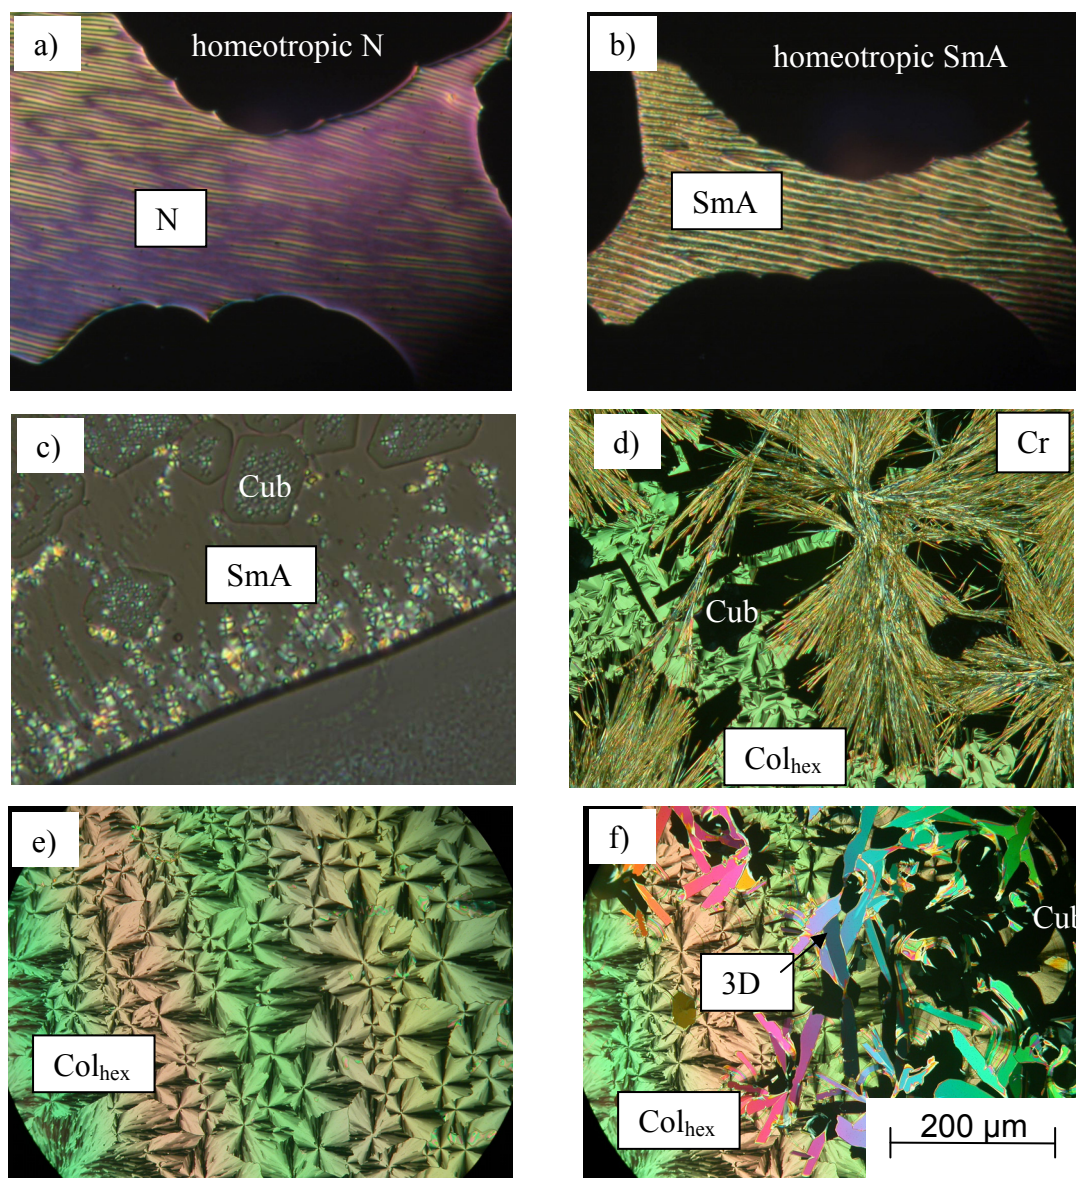

**Figure S4:** Selected textures of compounds **F $n$**  as observed between crossed polarizers between non-treated microscopy slides: a) texture at the  $N_{\text{CybA}}$ -SmA transition of compound **F8** at 181 °C; b) SmA-phase of compound **F8** at 180.5 °C; c) oily streaks texture of the SmA phase of **F8** coexisting with the  $\text{Cub}_{\text{bi}}/\text{Ia}\bar{3}d$  phase at 179 °C; d) growth of the  $\text{Cub}_{\text{bi}}/\text{Ia}\bar{3}d$  (black regions) and crystalline phase into the  $\text{Col}_{\text{hex}}$  (green spherulitic region) of compound **F16** at 149 °C; e)  $\text{Col}_{\text{hex}}$  phase of compound **F18** at 140 °C and f) development of the cubic phase (black areas) and, accompanied by a non-cubic birefringent 3D phase (uniformly colored mosaics) on cooling the  $\text{Col}_{\text{hex}}$  phase of **F18** at 124 °C; the 3D phase occurs only at the  $\text{Col}_{\text{hex}}$ - $\text{Cub}_{\text{bi}}$  phase transition and disappears on further cooling.

### 1.3 Additional XRD data

**Table S1:** Experimental and calculated  $d$ -spacings, relative integrated intensities, and phases used in the reconstruction of electron densities for the  $\text{Cub}_{\text{bi}}/Ia\bar{3}d$  phase for **H10** at 160 °C. All Intensities values are Lorentz and multiplicity corrected.

| $(hkl)$                            | $d_{\text{obs.}}$ - spacings (nm) | $d_{\text{cal.}}$ - spacings (nm) | Intensity | Phase |
|------------------------------------|-----------------------------------|-----------------------------------|-----------|-------|
| (211)                              | 3.74                              | 3.74                              | 100.0     | $\pi$ |
| (220)                              | 3.24                              | 3.24                              | 5.7       | $\pi$ |
| (321)                              | 2.45                              | 2.45                              | 0.7       | $\pi$ |
| (400)                              | 2.29                              | 2.29                              | 13.0      | $\pi$ |
| (420)                              | 2.05                              | 2.05                              | 37.3      | $\pi$ |
| (332)                              | 1.95                              | 1.95                              | 87.2      | 0     |
| (422)                              | 1.87                              | 1.87                              | 44.1      | 0     |
| (431)                              | 1.80                              | 1.80                              | 21.0      | 0     |
| (521)                              | 1.67                              | 1.67                              | 0.8       | 0     |
| (440)                              | 1.62                              | 1.62                              | 0.4       | 0     |
| (532)                              | 1.49                              | 1.49                              | 0.5       | /     |
| (611)                              |                                   |                                   | 1.0       | /     |
| (541)                              | 1.41                              | 1.41                              | 0.4       | /     |
| (631)                              | 1.35                              | 1.41                              | 0.04      | /     |
| $a_{\text{cub}} = 9.17 \text{ nm}$ |                                   |                                   |           |       |

**Table S2:** Experimental and calculated  $d$ -spacings, relative integrated intensities, and phases used in the reconstruction of electron densities for the  $\text{Col}_{\text{hex}}/p6mm$  phase for **H10** at 176 °C. All intensities values are Lorentz and multiplicity corrected.

| $(hk)$                             | $d_{\text{obs.}}$ - spacings (nm) | $d_{\text{cal.}}$ - spacings (nm) | Intensity | Phase |
|------------------------------------|-----------------------------------|-----------------------------------|-----------|-------|
| (10)                               | 3.73                              | 3.73                              | 100.0     | 0     |
| (11)                               | 2.15                              | 2.15                              | 0.2       | $\pi$ |
| (20)                               | 1.86                              | 1.87                              | 28.7      | 0     |
| (21)                               | 1.41                              | 1.41                              | 0.3       | $\pi$ |
| $a_{\text{hex}} = 4.31 \text{ nm}$ |                                   |                                   |           |       |

**Table S3.** Experimental and calculated  $d$ -spacings, relative integrated intensities, and phases used in the reconstruction of electron densities for the  $\text{Cub}_{\text{bi}}/Ia\bar{3}d$  phase for **F18** at 120 °C. All Intensities values are Lorentz and multiplicity corrected.

| $(hkl)$                            | $d_{\text{obs.}}$ - spacings (nm) | $d_{\text{cal.}}$ - spacings (nm) | Intensity | Phase |
|------------------------------------|-----------------------------------|-----------------------------------|-----------|-------|
| (211)                              | 3.69                              | 3.69                              | 100.0     | $\pi$ |
| (220)                              | 3.19                              | 3.19                              | 3.7       | $\pi$ |
| (321)                              | 2.41                              | 2.41                              | 0.5       | $\pi$ |
| (420)                              | 2.02                              | 2.02                              | 2.3       | $\pi$ |
| (332)                              | 1.92                              | 1.93                              | 4.2       | 0     |
| (422)                              | 1.84                              | 1.84                              | 1.8       | 0     |
| (521)                              | 1.65                              | 1.65                              | 0.1       | 0     |
| (532)                              | 1.46                              | 1.46                              | 0.2       | /     |
| (611)                              |                                   |                                   | 0.4       | /     |
| (541)                              | 1.39                              | 1.39                              | 0.2       | /     |
| (631)                              | 1.33                              | 1.33                              | 0.3       | /     |
| (444)                              | 1.30                              | 1.30                              | 3.3       | /     |
| (543)                              | 1.27                              | 1.28                              | 3.2       | /     |
| (640)                              | 1.25                              | 1.25                              | 0.9       | /     |
| (552)                              | 1.23                              | 1.23                              | 0.7       | /     |
| (633)                              |                                   |                                   | 0.7       | /     |
| (721)                              |                                   |                                   | 0.3       | /     |
| (642)                              | 1.20                              | 1.21                              | 0.4       | /     |
| $a_{\text{cub}} = 9.03 \text{ nm}$ |                                   |                                   |           |       |

**Table S4.** Experimental and calculated  $d$ -spacings, relative integrated intensities, and phases used in the reconstruction of electron densities for the  $\text{Col}_{\text{hex}}/p6mm$  phase for **F18** at 145 °C. All intensities values are Lorentz and multiplicity corrected.

| $(hk)$                     | $d_{\text{obs.}}$ - spacings (nm) | $d_{\text{cal.}}$ - spacings (nm) | Intensity | Phase |
|----------------------------|-----------------------------------|-----------------------------------|-----------|-------|
| (10)                       | 3.72                              | 3.72                              | 100.0     | 0     |
| (11)                       | 2.15                              | 2.15                              | 0.9       | $\pi$ |
| (20)                       | 1.86                              | 1.86                              | 7.9       | 0     |
| (21)                       | 1.40                              | 1.41                              | 1.2       | $\pi$ |
| (30)                       | 1.24                              | 1.24                              | 0.1       | 0     |
| $a_{\text{hex}} = 4.30$ nm |                                   |                                   |           |       |

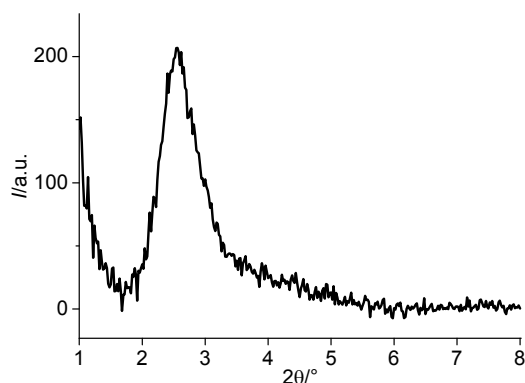

**Figure S5:** SAXS pattern of the  $\text{N}_{\text{CyBA}}$  phase of **F8** at 186 °C.

**Table S5:** Experimental and calculated  $d$ -spacings of the  $\text{Cub}_{\text{bi}}/Ia\bar{3}d$  phases.<sup>a</sup>

| Comp.      | $T/^\circ\text{C}$ | $2\theta/^\circ$ | $\theta/^\circ$ | $d_{\text{obs}}/\text{nm}$ | $hkl$ | $d_{\text{calc}}/\text{nm}$ | $\frac{d_{\text{obs}}}{d_{\text{calc}}}$ | $a_{\text{cub}}/\text{nm}$ |
|------------|--------------------|------------------|-----------------|----------------------------|-------|-----------------------------|------------------------------------------|----------------------------|
| <b>F8</b>  | 160                | 2.375            | 1.188           | 3.720                      | 211   | 3.720                       | 0.00                                     | 9.11                       |
|            |                    | 2.747            | 1.374           | 3.216                      | 220   | 3.221                       | -0.01                                    |                            |
| <b>F10</b> | 170                | 2,403            | 1,202           | 3,676                      | 211   | 3,676                       | 0,00                                     | 9.00                       |
|            |                    | 2,749            | 1,375           | 3,214                      | 220   | 3.184                       | 0.03                                     |                            |
| <b>F14</b> | 160                | 2.428            | 1.214           | 3.639                      | 211   | 3.637                       | 0.00                                     | 8.91                       |
|            |                    | 2.782            | 1.391           | 3.176                      | 220   | 3.150                       | 0.03                                     |                            |

<sup>a</sup> **F12** was reported in ref. [S1]; **F16** could not be investigated due to rapid crystallization during exposure time; the  $Ia\bar{3}d$  lattice was additionally supported by the absence of chiral domains.



**Table S6:** Experimental and calculated  $d$ -spacings of the  $\text{Col}_{\text{hex}}/p6mm$  phase of compounds **H18** and **F16**.

| Comp.      | $T/^\circ\text{C}$ | $2\theta/^\circ$ | $\theta/^\circ$ | $d_{\text{obs}}/\text{nm}$ | $hk$ | $d_{\text{calc}}/\text{nm}$ | $d_{\text{obs}}-d_{\text{calc}}/\text{nm}$ | $a_{\text{hex}}/\text{nm}$ |
|------------|--------------------|------------------|-----------------|----------------------------|------|-----------------------------|--------------------------------------------|----------------------------|
| <b>H18</b> | 155                | 2.384            | 1.192           | 3.706                      | (10) | 3.706                       | 0.00                                       | 4.28                       |
|            |                    | 4.626            | 2.313           | 1.91                       | (20) | 1.853                       | 0.06                                       |                            |
|            |                    | 4.879            | 2.439           | 1.811                      | (20) | 1.821                       | 0.01                                       |                            |
| <b>F16</b> | 160                | 2.383            | 1.192           | 3.707                      | (10) | 3.707                       | 0.00                                       | 4.28                       |
|            |                    | 4.047            | 2.024           | 2.183                      | (11) | 2.140                       | 0.04                                       |                            |
|            |                    | 4.791            | 2.396           | 1.844                      | (20) | 1.854                       | 0.01                                       |                            |

<sup>a</sup> **H12** was reported in ref. [S2].

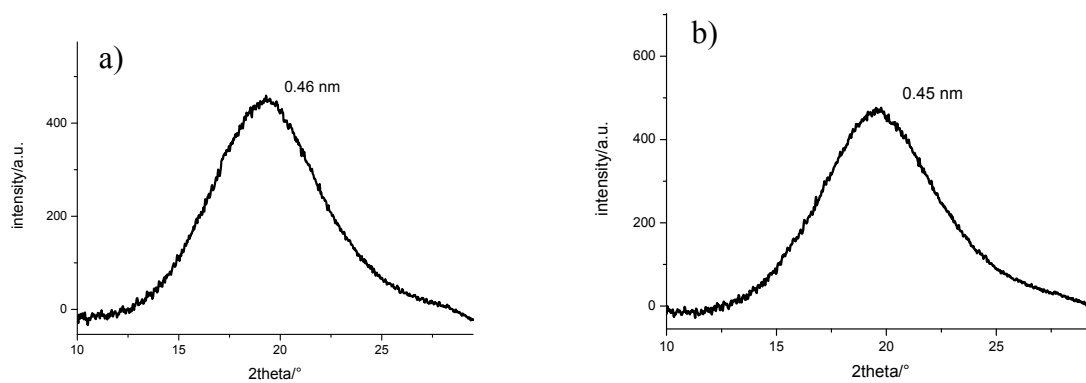

**Figure S6:** WAXS pattern of compound **H10** at a) 177 °C ( $\text{Col}_{\text{hex}}/p6mm$ ) and b) 160 °C ( $\text{Cub}/Ia\bar{3}d$ ).

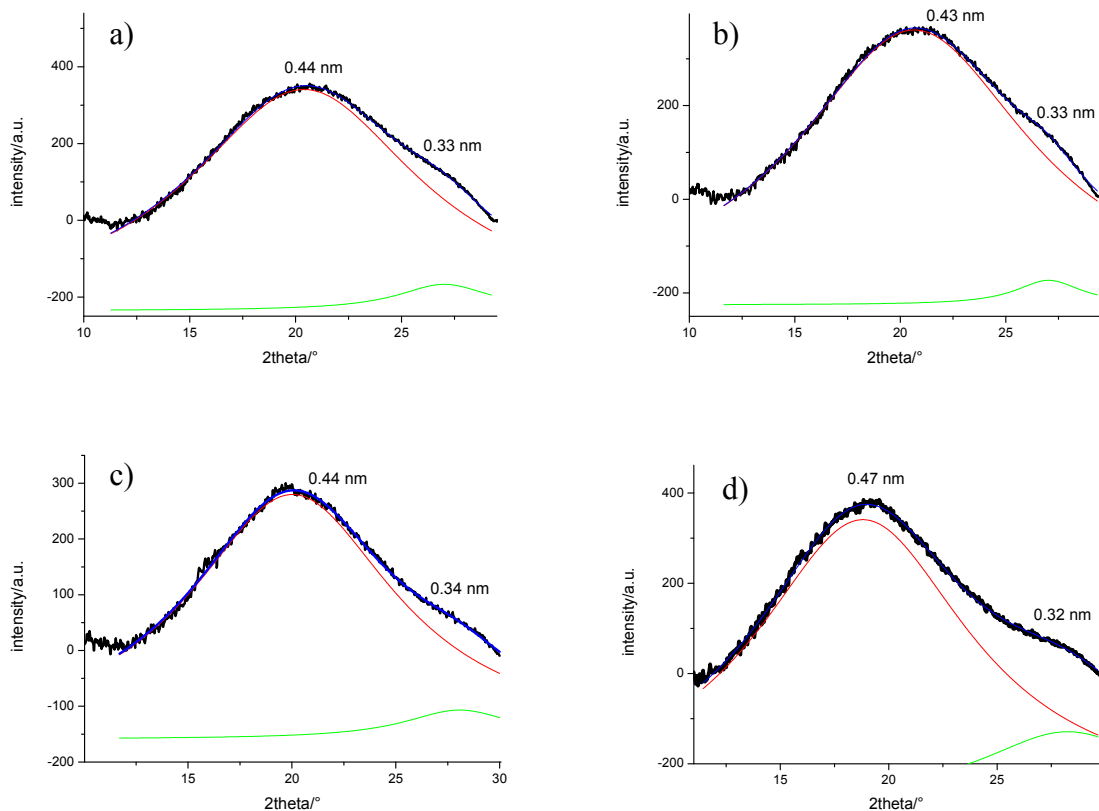

**Figure S7:** WAXS patterns of a) **F8** at 185 °C (nematic), b) **F8** at 160 °C ( $Cub/Ia\bar{3}d$ ), c) **F10** at 170 °C ( $Cub/Ia\bar{3}d$ ) and d) **F16** at 160 °C ( $Col_{hex}/p6mm$ ).

**Table S7:** Structural data of the  $Col_{hex}/p6mm$  LC-phases of compounds **Hn** and **Fn**<sup>a</sup>

| Comp                     | $a$ /nm | $V_{mol}/nm^3$ | $V_{cell}/nm^3$ | $n_{cell,cryst}$ | $n_{cell,liq}$ | $n_{cell,LC}$ | $n_{Wall}$ |
|--------------------------|---------|----------------|-----------------|------------------|----------------|---------------|------------|
| <b>H10</b>               | 4.31    | 1.358          | 7.40            | 5.45             | 4.28           | 4.87          | 1.6        |
| <b>H12</b> <sup>S2</sup> | 4.30    | 1.457          | 7.21            | 4.94             | 3.88           | 4.41          | 1.5        |
| <b>H18</b>               | 4.28    | 1.755          | 7.14            | 4.07             | 3.19           | 3.63          | 1.2        |
| <b>F16</b>               | 4.28    | 1.703          | 7.14            | 4.19             | 3.29           | 3.74          | 1.2        |
| <b>F18</b>               | 4.30    | 1.802          | 7.37            | 4.09             | 3.21           | 3.65          | 1.2        |

<sup>a</sup>  $V_{cell}$  = volume of the unit cell defined by  $(3^{1/2} a_{hex}^2/2) \times h$  with  $h = 0.46$  nm corresponding to the maximum of the diffuse wide angle scattering;  $V_{mol}$  = volume for a single molecule as calculated using the crystal volume increments;<sup>S3</sup>  $n_{cell,cryst} = V_{cell}/V_{mol}$  (average packing coefficient in the crystal is  $k = 0.7$ );<sup>S4</sup>  $n_{cell,liq}$  = number of molecules in the unit cell of an isotropic liquid with an average packing coefficient  $k = 0.55$ , calculated according to  $n_{cell,liq} = 0.55/0.7 \times n_{cell,cryst}$ ;  $n_{cell,LC}$  = number of molecules in the unit cell in the LC phase estimated as the average of  $n_{cell,cryst}$  and  $n_{cell,liq}$ .  $n_{wall}$  = number of molecules in the lateral cross section of the cylinder walls, calculated for the triangular honeycombs as  $n_{cell,LC}/\text{number of wall per unit cell} = n_{cell,LC}/3$ .  $n_{wall} = 1.2-1.5$  means that on average 1.2-1.5 molecules are laterally arranged in each hypothetical segment with  $h = 0.46$  nm, i.e. there is a lateral staggering of the molecules in the cylinder walls or the packing of the aromatic cores is a bit closer than the assumed distance of 0.46 nm.

**Table S8:** Structural data of the cubic phases of compounds **Hn** and **Fn**.<sup>a</sup>

| Comp.                                                                                  | <b>H10</b> | <b>F8</b> | <b>F10</b> | <b>F12</b> <sup>S1</sup> | <b>F14</b> | <b>F18</b> |
|----------------------------------------------------------------------------------------|------------|-----------|------------|--------------------------|------------|------------|
| <i>a</i> (nm)                                                                          | 9.16       | 9.11      | 9.00       | 9.12                     | 8.91       | 9.03       |
| <i>V</i> <sub>cell</sub> (nm <sup>3</sup> )                                            | 768        | 756       | 729        | 758                      | 707        | 736        |
| <i>V</i> <sub>mol</sub> (nm <sup>3</sup> )                                             | 1.36       | 1.31      | 1.41       | 1.50                     | 1.60       | 1.80       |
| <i>n</i> <sub>cell,cryst</sub><br>= <i>V</i> <sub>cell</sub> / <i>V</i> <sub>mol</sub> | 565        | 577       | 517        | 505                      | 442        | 409        |
| <i>n</i> <sub>cell, liq</sub>                                                          | 444        | 453       | 406        | 397                      | 347        | 321        |
| <i>n</i> <sub>cell,LC</sub>                                                            | 505        | 515       | 462        | 451                      | 395        | 365        |
| Minimal Surface <i>S</i><br>(nm <sup>2</sup> )                                         | 206        | 204       | 199        | 204                      | 195        | 200        |
| <i>n</i> <sub>cell</sub> / <i>S</i><br>(molecules/nm <sup>-2</sup> )                   | 2.5        | 2.5       | 2.3        | 2.2                      | 2.0        | 1.8        |
| <i>A</i> <sub>mol</sub> (nm <sup>2</sup> )                                             | 0.41       | 0.40      | 0.43       | 0.45                     | 0.49       | 0.55       |
| <i>d</i> <sub>net</sub> (nm)                                                           | 3.97       | 3.94      | 3.89       | 3.95                     | 3.85       | 3.93       |

<sup>a</sup> *V*<sub>cell</sub> = *a*<sub>cub</sub><sup>3</sup>; *V*<sub>mol</sub> = volume for a single molecule as calculated using the crystal volume increments;<sup>S3</sup> for the calculations of *n*<sub>cell,cryst</sub>, *n*<sub>cell,liq</sub> and *n*<sub>cell,LC</sub>, see Table S7. *S* = area of the minimal surface in the unit cell of the *Ia* $\bar{3}$ *d* phase<sup>S5</sup> is *S* = 2.4533 × *a*<sub>cub</sub><sup>2</sup>; *S*<sub>mol</sub> = molecular area on the minimal surface (*S*<sub>mol</sub> = *S*/*n*<sub>cell</sub>).<sup>S6</sup> *d*<sub>net</sub> = lateral distance between the two infinite networks of the cubic mesophase as determined by 3<sup>1/2</sup>*a*<sub>cub</sub>/4.<sup>S5</sup>

## 2. Synthesis and analytical data

### 2.2.1 General synthetic procedures

**P1: Cross-coupling reaction according to Sonogashira<sup>S7</sup>:** A mixture of 1,4-dialkoxy-2,5-diiodobenzene **4.n** (1 equ.) and the appropriate acetylene (2.1 equ.) was dissolved in purified Et<sub>3</sub>N (50 mL/≤1 mmol). After degassing with argon for 30 min [Pd(PPh<sub>3</sub>)<sub>4</sub>] (3 mol%) and CuI (2 mol%) were added and the mixture was refluxed for 6 h. After removing the solvent the obtained residue was purified by column chromatography. In a similar way the syntheses of **2FSi** and **3FSi** were conducted by Sonogashira cross coupling of monovalent aryl iodides using the molar ratios and catalyst given in the procedures in 2.2.3.

**P2: Desilylation<sup>S2</sup>:** The appropriate silyl protected acetylene (1 equ.) and K<sub>2</sub>CO<sub>3</sub> (5 equ) were dissolved in DCM/MeOH (2:1; 15 mL/mmol) and stirred at 20 °C. The progress of the reaction was recorded by TLC. The reaction was quenched with H<sub>2</sub>O (50 mL) and the different phases were separated. The aqueous phase was extracted with DCM (3 x 50 mL). The combined organic phases were washed with water and brine. After drying over Na<sub>2</sub>SO<sub>4</sub>

the solvent was removed under reduced pressure. The residue was purified by column chromatography.

**P3: Deprotection of the glycerol group with PPTS<sup>S8</sup>:** A mixture of the appropriate compound **5Hn** or **5Fn** (1 equ.) and PPTS (tip of a spatula) was dissolved in THF/MeOH (1:1) and stirred at 50 °C for 12 h. After finishing the reaction the solvent was removed and the residue was solved in DCM. The organic layer was washed with NaHCO<sub>3</sub> solution (3 x 50 mL), water and brine. After drying over Na<sub>2</sub>SO<sub>4</sub> the solvent was removed and the residue purified with column chromatography.

### 2.2.2 Synthesis of the 1,4-dialkoxy-2,5-diiodobenzenes

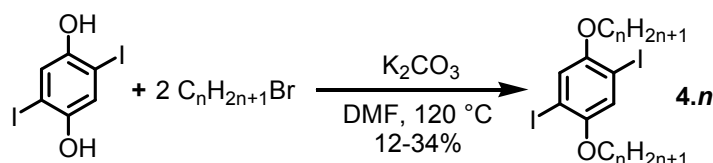

**Scheme S1:** Synthesis of the 1,4-dialkoxy-2,5-diiodobenzenes **4.n**.

**1,4-Dioctadecyloxy-2,5-diiodobenzene (4.18):** A mixture of 1,4-dihydroxy-2,5-diiodobenzene (1.00 g, 2.8 mmol), *n*-bromooctadecane (2.30 g, 7.0 mmol), K<sub>2</sub>CO<sub>3</sub> (1.90 g, 14.0 mmol) and Bu<sub>4</sub>NI (tip of a spatula) in anhydrous DMF (50 mL) was stirred at 120 °C for 12 h. After cooling to room temperature, the reaction was poured into water (50 mL) and the aqueous layer was extracted with Et<sub>2</sub>O (3x50 mL). The combined organic layers were washed with saturated aqu. LiCl, water and brine. After drying over anhydrous Na<sub>2</sub>SO<sub>4</sub>, filtration and evaporation of the solvent, the crude product was purified by column chromatography (eluent: *n*-hexane). Colorless solid, C<sub>42</sub>H<sub>76</sub>I<sub>2</sub>O<sub>2</sub>, *M* = 866.39 g/mol, mp 82 °C, yield: 0.76 g (32%), <sup>1</sup>H-NMR (400 MHz, CDCl<sub>3</sub>) δ 7.17 (s, 2H, Ar-*H*), 3.92 (t, <sup>3</sup>*J*(H,H) = 6.4 Hz, 4H, -OCH<sub>2</sub>-), 1.87 – 1.66 (m, 4H, -CH<sub>2</sub>-), 1.57 – 1.19 (m, 56H, -CH<sub>2</sub>-), 0.87 (d, <sup>3</sup>*J*(H,H) = 7.0 Hz, 6H, -CH<sub>3</sub>) ppm.

### 2.2.3 Synthesis of 3-[4-(4-ethynylphenylethynyl)-2,3,5,6-tetrafluorophenyl]-1,2-isopropylidene-*rac*-glycerol (3F)

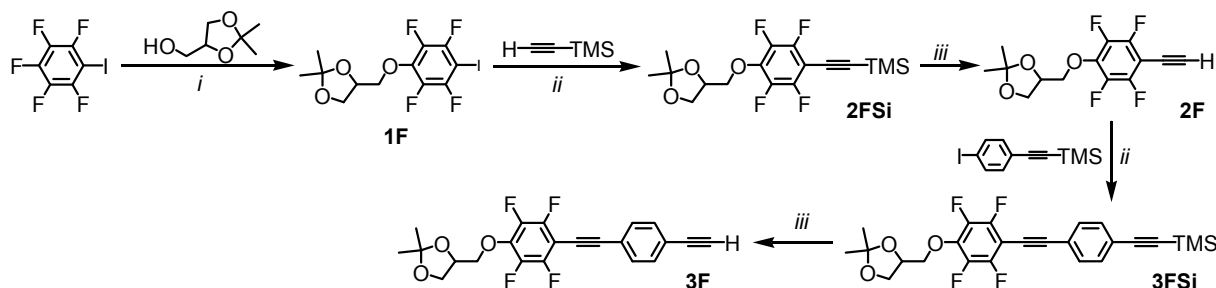

**Scheme S2:** Synthesis of **3F**. *Reagents and conditions:* i) K<sub>2</sub>CO<sub>3</sub>, DMF, 40 °C, 3d, 59%, ii) NEt<sub>3</sub>, [Pd(PPh<sub>3</sub>)<sub>4</sub>], CuI, 40 °C, 12h, 94%, iii) K<sub>2</sub>CO<sub>3</sub>, DCM/MeOH (2:1), 2h, 60-90%.

**1,2-Isopropylidene-3-(2,3,5,6-tetrafluoro-4-iodophenyl)-rac-glycerol (1F):** According to the procedure described by Wen et al.<sup>S9</sup> a mixture of pentafluoroiodobenzene (5.00 g, 17.0 mmol) and D,L-1,2-isopropylidene-glycerole (2.91 g, 22.1 mmol) was solved in DMF (50 mL) and stirred for 10 min at 20 °C. After the stepwise addition of K<sub>2</sub>CO<sub>3</sub> (3.04 g, 22.1 mmol) the reaction was stirred at 40 °C for 48 h. The reaction was quenched with water and the phases were separated. The aqueous phase was extracted with Et<sub>2</sub>O (3 x 50 mL). The combined organic phases were washed with water and brine. After drying over Na<sub>2</sub>SO<sub>4</sub> the solvent was removed and the residue purified by column chromatography (eluent: CHCl<sub>3</sub>). Colourless liquid; C<sub>12</sub>H<sub>11</sub>F<sub>4</sub>IO<sub>3</sub>; *M* = 405.97 g/mol; yield: 4.86 g (70%). <sup>1</sup>H-NMR (400 MHz, CDCl<sub>3</sub>) δ 4.53 – 4.38 (m, 1H, –OCH–), 4.36 – 4.26 (m, 1H, –OCH<sub>2</sub>–), 4.24 – 4.09 (m, 2H, –OCH<sub>2</sub>–), 4.01 – 3.89 (m, 1H, –OCH<sub>2</sub>–), 1.42 (s, 3H, –CH<sub>3</sub>), 1.38 (s, 3H, –CH<sub>3</sub>) ppm. <sup>19</sup>F-NMR (376 MHz, CDCl<sub>3</sub>) δ -121.09 (td, <sup>3</sup>*J*(F,F) = 10.2 Hz, <sup>4</sup>*J*(F,F) = 5.0 Hz, Ar–F), -154.13 (td, <sup>3</sup>*J*(F,F) = 10.1 Hz, <sup>4</sup>*J*(F,F) = 4.9 Hz, Ar–F) ppm.

**1,2-Isopropylidene-3-[2,3,5,6-tetrafluoro-4-(trimethylsilylethynyl)phenyl]-rac-glycerol (2FSi):** Synthesized according to P1 from **2** (4.86 g, 11.9 mmol), ethynyltrimethylsilane (1.50 g, 15.6 mmol), [Pd(PPh<sub>3</sub>)<sub>4</sub>] (0.42 g, 0.36 mmol) and CuI (0.05 g, 0.24 mmol). Purification by column chromatography (eluent: CHCl<sub>3</sub>/*n*-hexane = 1:1). Colourless liquid; C<sub>17</sub>H<sub>20</sub>F<sub>4</sub>O<sub>3</sub>Si; *M* = 376.11 g/mol; yield: 4.23 g (95%). <sup>1</sup>H-NMR (400 MHz, CDCl<sub>3</sub>) δ 4.49 – 4.40 (m, 1H, –OCH–), 4.36 – 4.29 (m, 1H, –OCH<sub>2</sub>–), 4.27 – 4.11 (m, 2H, –OCH<sub>2</sub>–), 3.98 – 3.90 (m, 1H, –OCH<sub>2</sub>–), 1.42 (s, 3H, –CH<sub>3</sub>), 1.38 (s, 3H, –CH<sub>3</sub>), 0.32 (s, 9H, Si–(CH<sub>3</sub>)<sub>3</sub>) ppm. <sup>19</sup>F-NMR (376 MHz, CDCl<sub>3</sub>) δ -137.42 (td, <sup>3</sup>*J*(F,F) = 10.7 Hz, <sup>4</sup>*J*(F,F) = 4.0 Hz, Ar–F), -156.92 (td, <sup>3</sup>*J*(F,F) = 10.6 Hz, <sup>4</sup>*J*(F,F) = 3.9 Hz, Ar–F) ppm.

**3-(4-Ethynyl-2,3,5,6-tetrafluorophenyl)-1,2-isopropylidene-rac-glycerol (2F):** Synthesized according to P2 from **3** (4.23 g, 11.3 mmol) and K<sub>2</sub>CO<sub>3</sub> (7.76 g, 56.3 mmol). Purification by column chromatography (eluent: CHCl<sub>3</sub>/*n*-hexane = 1:1). Colourless liquid; C<sub>14</sub>H<sub>12</sub>F<sub>4</sub>O<sub>3</sub>; *M* = 334.12 g/mol; yield: 3.36 g (98%). <sup>1</sup>H-NMR (400 MHz, CDCl<sub>3</sub>) δ 4.49 – 4.40 (m, 1H, –OCH–), 4.36 – 4.29 (m, 1H, –OCH<sub>2</sub>–), 4.27 – 4.11 (m, 2H, –OCH<sub>2</sub>–), 3.98 – 3.90 (m, 1H, –OCH<sub>2</sub>–), 3.55 (s, 1H, –CH), 1.42 (s, 3H, –CH<sub>3</sub>), 1.38 (s, 3H, –CH<sub>3</sub>) ppm. <sup>19</sup>F-NMR (376 MHz, CDCl<sub>3</sub>) δ -137.47 (td, <sup>3</sup>*J*(F,F) = 10.7 Hz, <sup>4</sup>*J*(F,F) = 4.0 Hz, Ar–F), -156.70 (td, (F,F) = 10.6 Hz, <sup>4</sup>*J*(F,F) = 3.9 Hz, Ar–F) ppm.

**3-{4-[4-(Trimethylsilylethynyl)phenylethynyl]-2,3,5,6-tetrafluorophenyl}-1,2-isopropylidene-rac-glycerol (3FSi):** Synthesized according to P1 from **4** (3.37 g, 11.1 mmol), (4-iodophenylethynyl)trimethylsilane (3.66 g, 12.2 mmol), [Pd(PPh<sub>3</sub>)<sub>2</sub>Cl<sub>2</sub>] (0.24 g, 0.3 mmol) and CuI (0.06 g, 0.31 mmol). Purification by column chromatography (eluent: CHCl<sub>2</sub>/*n*-hexane = 4:1). Colorless solid; C<sub>25</sub>H<sub>24</sub>F<sub>4</sub>O<sub>3</sub>Si; *M* = 476.14 g/mol; yield: 3.23 g (61%); mp = 95 °C. <sup>1</sup>H-NMR (400 MHz, CDCl<sub>3</sub>) δ 7.53 – 7.42 (m, 4H, Ar–H), 4.51 – 4.40 (m, 1H, –OCH–), 4.33 (dd, <sup>2</sup>*J*(H,H) = 10.1 Hz, <sup>3</sup>*J*(H,H) = 5.1 Hz, 1H, –OCH<sub>2</sub>–), 4.23 (dd, <sup>2</sup>*J*(H,H) = 10.1 Hz, <sup>3</sup>*J*(H,H) = 5.6 Hz, 1H, –OCH<sub>2</sub>–), 4.20 – 4.11 (m, 1H, –OCH<sub>2</sub>–), 3.99 – 3.92 (m, 1H, –OCH<sub>2</sub>–), 1.43 (s, 3H, –CH<sub>3</sub>), 1.38 (s, 3H, –CH<sub>3</sub>), 0.26 (s, 9H, –Si–(CH<sub>3</sub>)<sub>3</sub>) ppm. <sup>19</sup>F-NMR (376 MHz, CDCl<sub>3</sub>) δ -137.53 (td, <sup>3</sup>*J*(F,F) = 10.2 Hz, <sup>4</sup>*J*(F,F) = 3.4 Hz, Ar–F), -156.90 (td, <sup>3</sup>*J*(F,F) = 9.8 Hz, <sup>4</sup>*J*(F,F) = 2.9 Hz, Ar–F) ppm.

**3-[4-(4-Ethynylphenylethynyl)-2,3,5,6-tetrafluorophenyl]-1,2-isopropylidene-rac-glycerol (3F):** Synthesized according to P2 from **5** (3.23 g, 6.8 mmol) and K<sub>2</sub>CO<sub>3</sub> (4.70 g, 33.9 mmol). Purification by column chromatography (eluent: CHCl<sub>2</sub>/*n*-hexane = 4:1). Yellow solid; C<sub>22</sub>H<sub>16</sub>F<sub>4</sub>O<sub>3</sub>; *M* = 434.15 g/mol; yield: 1.22 g (44%); mp = 42 °C. <sup>1</sup>H-NMR (400 MHz, CDCl<sub>3</sub>) δ 7.57 – 7.45 (m, 4H, Ar – H), 4.53 – 4.39 (m, 1H, –OCH–), 4.33 (dd, <sup>2</sup>*J*(H,H) = 10.1

Hz,  $^3J(\text{H,H}) = 5.1$  Hz, 1H,  $-\text{OCH}_2-$ ), 4.24 (dd,  $^2J(\text{H,H}) = 10.1$  Hz,  $^3J(\text{H,H}) = 5.6$  Hz, 1H,  $-\text{OCH}_2-$ ), 4.16 (dd,  $^2J(\text{H,H}) = 8.5$  Hz,  $^3J(\text{H,H}) = 6.5$  Hz, 1H,  $-\text{OCH}_2-$ ), 3.96 (dd,  $^2J(\text{H,H}) = 8.6$  Hz,  $^3J(\text{H,H}) = 5.6$  Hz, 1H,  $-\text{OCH}_2-$ ), 3.20 (s, 1H,  $-\text{CH}$ ), 1.43 (s, 3H,  $-\text{CH}_3$ ), 1.38 (s, 3H,  $-\text{CH}_3$ ) ppm.  $^{19}\text{F}$ -NMR (376 MHz,  $\text{CDCl}_3$ )  $\delta$  -137.48 (td,  $^3J(\text{F,F}) = 10.2$  Hz,  $^4J(\text{F,F}) = 3.4$  Hz, Ar-F), -156.87 (td, (F,F) = 9.8 Hz,  $^4J(\text{F,F}) = 2.8$  Hz, Ar-F) ppm.

## 2.2.4 Synthesis of the fluorinated and non fluorinated acetonides

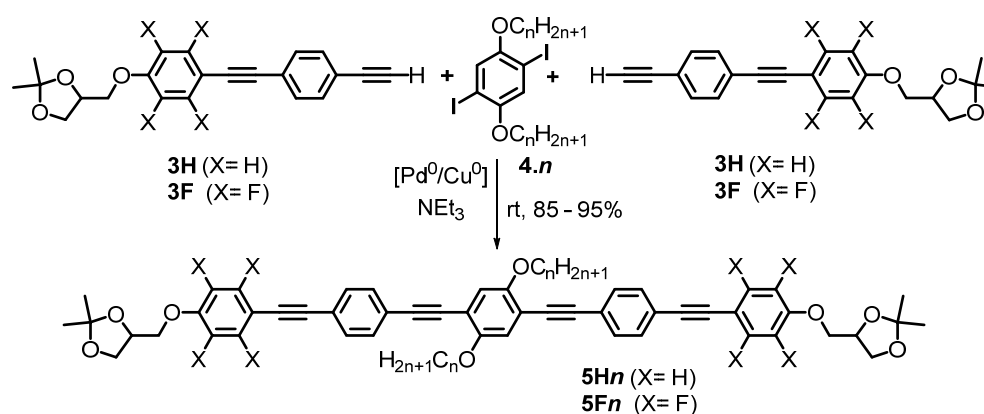

**Scheme S3:** Synthesis of the fluorinated and non fluorinated acetonides **5Hn** and **5Fn**.

**1,4-Dibutyloxy-2,5-bis{4-[4-(1,2-isopropylidene-*rac*-glycero-3)phenylethynyl]phenylethynyl}benzene (**5H4**):** Synthesized according to P1 from **4.4** (133 mg, 0.28 mmol), **3H** (195 mg, 0.59 mmol),  $[\text{Pd}(\text{PPh}_3)_4]$  (9.7 mg, 0.008 mmol), CuI (1.1 mg, 0.006 mmol) in  $\text{NEt}_3$  (50 mL). Purification by column chromatography (eluent:  $\text{CHCl}_3$ ). Yellow solid,  $\text{C}_{58}\text{H}_{58}\text{O}_8$ ,  $M = 882.41$  g/mol, mp 210 °C, yield: 250 mg (95%),  $^1\text{H}$ -NMR (400 MHz,  $\text{CDCl}_3$ )  $\delta$  7.50 – 7.43 (m, 12H, Ar-H), 7.01 (s, 2H, Ar-H), 6.94 – 6.86 (m, 4H, Ar-H), 4.53 – 4.43 (m, 2H,  $-\text{CH}-$ ), 4.18 (dd,  $^2J(\text{H,H}) = 8.5$  Hz,  $^3J(\text{H,H}) = 6.4$  Hz, 2H,  $-\text{OCH}_2-$ ), 4.11 – 4.02 (m, 4H,  $-\text{OCH}_2-$ ), 3.97 (dd,  $^2J(\text{H,H}) = 9.5$  Hz,  $^3J(\text{H,H}) = 5.8$  Hz, 2H,  $-\text{OCH}_2-$ ), 3.91 (dd,  $^2J(\text{H,H}) = 8.5$  Hz,  $^3J(\text{H,H}) = 5.8$  Hz, 2H,  $-\text{OCH}_2-$ ), 1.93 – 1.79 (m, 4H,  $-\text{CH}_2-$ ), 1.66 – 1.50 (m, 4H,  $-\text{CH}_2-$ ), 1.47 (s, 3H,  $-\text{CH}_3$ ), 1.41 (s, 3H,  $-\text{CH}_3$ ), 1.01 (t,  $^3J(\text{H,H}) = 7.4$  Hz, 3H,  $-\text{CH}_3$ ) ppm.

**1,4-Dihexyloxy-2,5-bis{4-[4-(1,2-isopropylidene-*rac*-glycero-3)phenylethynyl]phenylethynyl}benzene (**5H6**):** Synthesized according to P1 from **4.6** (328 mg, 0.75 mmol), **3H** (600 mg, 1.81 mmol),  $[\text{Pd}(\text{PPh}_3)_4]$  (26.2 mg, 0.027 mmol), CuI (2.9 mg, 0.015 mmol) in  $\text{NEt}_3$  (50 mL). Purification by column chromatography (eluent:  $\text{CHCl}_3$ ). Yellow solid,  $\text{C}_{62}\text{H}_{66}\text{O}_8$ ,  $M = 939.20$  g/mol, yield: 371 mg (53%),  $^1\text{H}$ -NMR (400 MHz,  $\text{CDCl}_3$ )  $\delta$  7.59 – 7.36 (m, 12H, Ar-H), 6.99 (s, 2H, Ar-H), 6.91 – 6.84 (m, 4H, Ar-H), 4.51 – 4.42 (m, 2H,  $-\text{OCH}-$ ), 4.16 (dd,  $^2J(\text{H,H}) = 8.5$  Hz,  $^3J(\text{H,H}) = 6.4$  Hz, 2H,  $-\text{OCH}_2-$ ), 4.11 – 3.99 (m, 6H,  $-\text{OCH}_2-$ ), 3.95 (dd,  $^2J(\text{H,H}) = 9.6$  Hz,  $^3J(\text{H,H}) = 5.9$  Hz, 2H,  $-\text{OCH}_2-$ ), 3.89 (dd,  $^2J(\text{H,H}) = 8.5$  Hz,  $^3J(\text{H,H}) = 5.8$  Hz, 2H,  $-\text{OCH}_2-$ ), 1.88 – 1.78 (m, 4H,  $-\text{CH}_2-$ ), 1.59 – 1.48 (m, 4H,  $-\text{CH}_2-$ ), 1.45 (s, 6H,  $-\text{CH}_3$ ), 1.39 (s, 6H,  $-\text{CH}_3$ ), 1.38 – 1.27 (m, 8H,  $-\text{CH}_2-$ ), 0.89 (t,  $^3J(\text{H,H}) = 7.1$  Hz, 6H,  $-\text{CH}_3$ ) ppm.

**1,4-Dioctyloxy-2,5-bis{4-[4-(1,2-isopropylidene-*rac*-glycero-3)phenylethynyl]phenylethynyl}benzene (5H8):** Synthesized according to P1 from **4.8** (147 mg, 0.25 mmol), **3H** (175 mg, 0.52 mmol), [Pd(PPh<sub>3</sub>)<sub>4</sub>] (8.7 mg, 0.008 mmol), CuI (1.0 mg, 0.005 mmol) in NEt<sub>3</sub> (50 mL). Purification by column chromatography (eluent: CHCl<sub>3</sub>). Yellow solid, C<sub>66</sub>H<sub>74</sub>O<sub>8</sub>, *M* = 994.54 g/mol, mp, 157 °C, yield: 250 mg (95%), <sup>1</sup>H-NMR (400 MHz, CDCl<sub>3</sub>) δ 7.52 – 7.43 (m, 12H, Ar-*H*), 7.01 (s, 2H, Ar-*H*), 6.94 – 6.87 (m, 4H, Ar-*H*), 4.54 – 4.44 (m, 2H), 4.18 (dd, <sup>2</sup>*J*(H,H) = 8.5 Hz, <sup>3</sup>*J*(H,H) = 6.4 Hz, 2H, -OCH-), 4.13 – 4.01 (m, 4H, -OCH<sub>2</sub>-), 3.97 (dd, <sup>2</sup>*J*(H,H) = 9.6 Hz, <sup>3</sup>*J*(H,H) = 5.9 Hz, 2H, -OCH<sub>2</sub>-), 3.91 (dd, <sup>2</sup>*J*(H,H) = 8.5 Hz, <sup>3</sup>*J*(H,H) = 5.8 Hz, 2H, -OCH<sub>2</sub>-), 1.92 – 1.78 (m, 4H, -CH<sub>2</sub>-), 1.61 – 1.20 (m, 34H, -CH<sub>2</sub>-, -OCH<sub>3</sub>-), 0.88 (t, <sup>3</sup>*J*(H,H) = 6.9 Hz, 6H, -CH<sub>3</sub>) ppm.

**1,4-Didecyloxy-2,5-bis{4-[4-(1,2-isopropylidene-*rac*-glycero-3)phenylethynyl]phenylethynyl}benzene (5H10):** Synthesized according to P1 from **4.10** (122 mg, 0.20 mmol), **3H** (139 mg, 0.42 mmol), [Pd(PPh<sub>3</sub>)<sub>4</sub>] (6.9 mg, 0.006 mmol), CuI (0.7 mg, 0.004 mmol) in NEt<sub>3</sub> (50 mL). Purification by column chromatography (eluent: CHCl<sub>3</sub>). Yellow solid, C<sub>70</sub>H<sub>82</sub>O<sub>8</sub>, *M* = 1050.60 g/mol, mp 142 °C, yield: 200 mg (95%), <sup>1</sup>H-NMR (400 MHz, CDCl<sub>3</sub>) δ 7.53 – 7.44 (m, 12H, Ar-*H*), 7.01 (s, 2H, Ar-*H*), 6.94 – 6.86 (m, 4H, Ar-*H*), 4.53 – 4.45 (m, 2H, -OCH-), 4.18 (dd, <sup>2</sup>*J*(H,H) = 8.5 Hz, <sup>3</sup>*J*(H,H) = 6.4 Hz, 2H, -OCH<sub>2</sub>-), 4.08 (dd, <sup>2</sup>*J*(H,H) = 9.5 Hz, <sup>3</sup>*J*(H,H) = 5.4 Hz, 2H, -OCH<sub>2</sub>-), 4.04 (t, <sup>3</sup>*J*(H,H) = 6.4 Hz, 4H, -OCH<sub>2</sub>-CH<sub>2</sub>-), 3.97 (dd, <sup>2</sup>*J*(H,H) = 9.6 Hz, <sup>3</sup>*J*(H,H) = 5.9 Hz, 2H, -OCH<sub>2</sub>-), 3.91 (dd, <sup>2</sup>*J*(H,H) = 8.5 Hz, <sup>3</sup>*J*(H,H) = 5.8 Hz, 2H, -OCH<sub>2</sub>-), 1.92 – 1.79 (m, 4H, -CH<sub>2</sub>-), 1.62 – 1.16 (m, 40H, -CH<sub>2</sub>-, -CH<sub>3</sub>), 0.88 (t, <sup>3</sup>*J*(H,H) = 6.9 Hz, 6H, -CH<sub>3</sub>) ppm.

**1,4-Dioctadecyloxy-2,5-bis{4-[4-(1,2-isopropylidene-*rac*-glycero-3)phenylethynyl]phenylethynyl}benzene (5H18):** Synthesized according to P1 from **4.18** (310 mg, 0.40 mmol), **3H** (315 mg, 0.95 mmol), [Pd(PPh<sub>3</sub>)<sub>4</sub>] (14.0 mg, 0.012 mmol), CuI (2.0 mg, 0.008 mmol) in NEt<sub>3</sub> (50 mL). Purification by column chromatography (eluent: CHCl<sub>3</sub>). Yellow solid, C<sub>86</sub>H<sub>114</sub>O<sub>8</sub>, *M* = 1275.84 g/mol, yield: 93 mg (18%), <sup>1</sup>H-NMR (400 MHz, CDCl<sub>3</sub>) δ 7.52 – 7.39 (m, 12H, Ar-*H*), 6.99 (s, 2H, Ar-*H*), 6.91 – 6.85 (m, 4H, Ar-*H*), 4.52 – 4.42 (m, 2H, -CH-), 4.16 (dd, <sup>2</sup>*J*(H,H) = 8.5 Hz, <sup>3</sup>*J*(H,H) = 6.5 Hz, 2H, -OCH<sub>2</sub>-), 4.06 (dd, <sup>2</sup>*J*(H,H) = 9.5 Hz, <sup>3</sup>*J*(H,H) = 5.4 Hz, 2H, -OCH<sub>2</sub>-), 4.02 (t, <sup>3</sup>*J*(H,H) = 6.4 Hz, 4H, -OCH<sub>2</sub>-), 3.95 (dd, <sup>2</sup>*J*(H,H) = 9.5 Hz, <sup>3</sup>*J*(H,H) = 5.9 Hz, 2H, -OCH<sub>2</sub>-), 3.89 (dd, <sup>2</sup>*J*(H,H) = 8.5 Hz, <sup>3</sup>*J*(H,H) = 5.8 Hz, 2H, -OCH<sub>2</sub>-), 1.89 – 1.77 (m, 4H, -CH<sub>2</sub>-), 1.60 – 1.47 (m, 4H, -CH<sub>2</sub>-), 1.45 (s, 6H, -CH<sub>3</sub>), 1.42 – 1.15 (m, 62H, -CH<sub>2</sub>-), 0.85 (t, <sup>3</sup>*J*(H,H) = 6.8 Hz, 6H, -CH<sub>3</sub>) ppm.

**1,4-Dihexyloxy-2,5-bis{4-[2,3,5,6-tetrafluoro-4-(1,2-isopropylidene-*rac*-glycero-3)phenylethynyl]phenylethynyl}benzene (5F6):** Synthesized according to P1 from **4.6** (122 mg, 0.23 mmol), **3F** (196 mg, 0.48 mmol), [Pd(PPh<sub>3</sub>)<sub>4</sub>] (7.9 mg, 0.007 mmol), CuI (0.9 mg, 0.005 mmol) in NEt<sub>3</sub> (50 mL). Purification by column chromatography (eluent: CHCl<sub>3</sub>). Yellow solid, C<sub>62</sub>H<sub>58</sub>F<sub>8</sub>O<sub>8</sub>, *M* = 1082.40 g/mol, mp 146 °C, yield: 240 mg (96%), <sup>1</sup>H-NMR (400 MHz, CDCl<sub>3</sub>) δ 7.59 – 7.51 (m, 8H, Ar-*H*), 7.02 (s, 2H, Ar-*H*), 4.51 – 4.41 (m, 2H, -OCH-), 4.34 (dd, <sup>2</sup>*J*(H,H) = 10.1 Hz, <sup>3</sup>*J*(H,H) = 5.1 Hz, 2H, -OCH<sub>2</sub>-), 4.24 (dd, <sup>2</sup>*J*(H,H) = 10.1 Hz, <sup>3</sup>*J*(H,H) = 5.6 Hz, 2H, -OCH<sub>2</sub>-), 4.16 (dd, <sup>2</sup>*J*(H,H) = 8.6 Hz, <sup>3</sup>*J*(H,H) = 6.4 Hz, 2H, -OCH<sub>2</sub>-), 4.04 (t, <sup>3</sup>*J*(H,H) = 6.5 Hz, 4H, -OCH<sub>2</sub>-), 3.96 (dd, <sup>2</sup>*J*(H,H) = 8.6 Hz, <sup>3</sup>*J*(H,H) = 5.6 Hz, 2H, -OCH<sub>2</sub>-), 1.91 – 1.81 (m, 4H, -CH<sub>2</sub>-), 1.61 – 1.29 (m, 24H, -CH<sub>2</sub>-, -CH<sub>3</sub>), 0.91 (t, <sup>3</sup>*J*(H,H) =

7.1 Hz, 6H,  $-CH_3$ ) ppm.  $^{19}F$ -NMR (376 MHz,  $CDCl_3$ )  $\delta$  -137.48 – -137.59 (m, Ar-F), -156.82 – -156.97 (m, Ar-F) ppm.

**1,4-Dioctyloxy-2,5-bis{4-[2,3,5,6-tetrafluoro-4-(1,2-isopropylidene-*rac*-glycero-3)phenylethynyl]phenylethynyl}benzene (5F8):** Synthesized according to P1 from **4.8** (129 mg, 0.22 mmol), **3F** (185 mg, 0.46 mmol),  $[Pd(PPh_3)_4]$  (5.2 mg, 0.007 mmol), CuI (0.8 mg, 0.004 mmol) in  $NEt_3$  (50 mL). Purification by column chromatography (eluent:  $CHCl_3$ ). Yellow solid,  $C_{66}H_{66}F_8O_8$ ,  $M = 1138.46$  g/mol, mp 135 °C, yield: 240 mg (95%),  $^1H$ -NMR (500 MHz,  $CDCl_3$ )  $\delta$  7.60 – 7.51 (m, 8H, Ar-H), 7.03 (s, 2H, Ar-H), 4.53 – 4.42 (m, 2H,  $-OCH-$ ), 4.35 (dd,  $^2J(H,H) = 10.1$  Hz,  $^3J(H,H) = 5.2$  Hz, 2H,  $-OCH_2-$ ), 4.25 (dd,  $^2J(H,H) = 10.1$  Hz,  $^3J(H,H) = 5.6$  Hz, 2H,  $-OCH_2-$ ), 4.18 (dd,  $^2J(H,H) = 8.6$  Hz,  $^3J(H,H) = 6.4$  Hz, 2H,  $-OCH_2-$ ), 4.05 (t,  $^3J(H,H) = 6.4$  Hz, 4H,  $-OCH_2-$ ), 3.98 (dd,  $^2J(H,H) = 8.6$  Hz,  $^3J(H,H) = 5.6$  Hz, 2H,  $-OCH_2-$ ), 1.97 – 1.80 (m, 4H,  $-CH_2-$ ), 1.65 – 1.19 (m, 32H,  $-CH_2-$ ,  $-CH_3$ ), 0.89 (t,  $^3J(H,H) = 6.8$  Hz, 6H,  $-CH_3$ ) ppm.  $^{19}F$ -NMR (470 MHz,  $CDCl_3$ )  $\delta$  -137.53 (td,  $^3J(F,F) = 9.9$  Hz,  $^4J(F,F) = 3.0$  Hz, Ar-F), -156.89 (td,  $^3J(F,F) = 9.7$  Hz,  $^4J(F,F) = 2.6$  Hz, Ar-F) ppm.

**1,4-Didecyloxy-2,5-bis{4-[2,3,5,6-tetrafluoro-4-(1,2-isopropylidene-*rac*-glycero-3)phenylethynyl]phenylethynyl}benzene (5F10):** Synthesized according to P1 from **4.10** (135 mg, 0.21 mmol), **3F** (178 mg, 0.44 mmol),  $[Pd(PPh_3)_4]$  (7.3 mg, 0.006 mmol), CuI (0.8 mg, 0.004 mmol) in  $NEt_3$  (50 mL). Purification by column chromatography (eluent:  $CHCl_3$ ). Yellow solid,  $C_{70}H_{74}F_8O_8$ ,  $M = 1194.53$  g/mol, mp 141 °C, yield: 230 mg (92%),  $^1H$ -NMR (400 MHz,  $CDCl_3$ )  $\delta$  7.58 – 7.50 (m, 8H, Ar-H), 7.02 (s, 2H, Ar-H), 4.50 – 4.42 (m, 2H,  $-OCH-$ ), 4.34 (dd,  $^2J(H,H) = 10.2$  Hz,  $^3J(H,H) = 5.1$  Hz, 2H,  $-OCH_2-$ ), 4.24 (dd,  $^2J(H,H) = 10.2$  Hz,  $^3J(H,H) = 5.5$  Hz, 2H,  $-OCH_2-$ ), 4.16 (dd,  $^2J(H,H) = 8.6$  Hz,  $^3J(H,H) = 6.4$  Hz, 2H,  $-OCH_2-$ ), 4.04 (t,  $^3J(H,H) = 6.4$  Hz, 4H,  $-OCH_2-$ ), 3.96 (dd,  $^2J(H,H) = 8.6$  Hz,  $^3J(H,H) = 5.6$  Hz, 2H,  $-OCH_2-$ ), 1.92 – 1.78 (m, 4H,  $-CH_2-$ ), 1.61 – 1.18 (m, 40H,  $-CH_2-$ ,  $-CH_3$ ), 0.87 (t,  $^3J(H,H) = 7.0$  Hz, 6H,  $-CH_3$ ) ppm.  $^{19}F$ -NMR (376 MHz,  $CDCl_3$ )  $\delta$  -137.49 – -137.60 (m, Ar-F), -156.85 – -156.97 (m, Ar-F) ppm.

**1,4-Didodecyloxy-2,5-bis{4-[2,3,5,6-tetrafluoro-4-(1,2-isopropylidene-*rac*-glycero-3)phenylethynyl]phenylethynyl}benzene (5F12):** Synthesized according to P1 from **4.12** (119 mg, 0.17 mmol), **3F** (144 mg, 0.36 mmol),  $[Pd(PPh_3)_4]$  (3.6 mg, 0.005 mmol), CuI (0.6 mg, 0.003 mmol) in  $NEt_3$  (50 mL). Purification by column chromatography (eluent:  $CHCl_3$ ). Yellow solid,  $C_{74}H_{82}F_8O_8$ ,  $M = 1250.59$  g/mol, mp 126 °C, yield: 210 mg (95%),  $^1H$ -NMR (400 MHz,  $CDCl_3$ )  $\delta$  7.59 – 7.49 (m, 8H, Ar-H), 7.02 (s, 2H, Ar-H), 4.50 – 4.41 (m, 2H,  $-OCH$ ), 4.33 (dd,  $^2J(H,H) = 10.1$  Hz,  $^3J(H,H) = 5.1$  Hz, 2H,  $-OCH_2$ ), 4.24 (dd,  $^2J(H,H) = 10.1$  Hz,  $^3J(H,H) = 5.6$  Hz, 2H,  $-OCH_2$ ), 4.16 (dd,  $^2J(H,H) = 8.6$  Hz,  $^3J(H,H) = 6.5$  Hz, 2H,  $-OCH_2$ ), 4.04 (t,  $^3J(H,H) = 6.4$  Hz, 4H,  $-OCH_2$ ), 3.96 (dd,  $^2J(H,H) = 8.6$  Hz,  $^3J(H,H) = 5.6$  Hz, 2H,  $-OCH_2$ ), 1.92 – 1.79 (m, 4H,  $-CH_2$ ), 1.60 – 1.48 (m, 8H,  $-CH_2$ ), 1.47 – 1.17 (m, 48H,  $-CH_2$ ,  $-CH_3$ ), 0.86 (t,  $^3J(H,H) = 6.7$  Hz, 6H,  $-CH_3$ ) ppm.  $^{19}F$ -NMR (376 MHz,  $CDCl_3$ )  $\delta$  -137.46 – -137.64 (m, Ar-F), -156.85 – -156.99 (m, Ar-F) ppm.

**1,4-Ditetradecyloxy-2,5-bis{4-[2,3,5,6-tetrafluoro-4-(1,2-isopropylidene-*rac*-glycero-3)phenylethynyl]phenylethynyl}benzene (5F14):** Synthesized according to P1 from **4.14**



(144 mg, 0.19 mmol), **3F** (161 mg, 0.40 mmol), [Pd(PPh<sub>3</sub>)<sub>4</sub>] (6.6 mg, 0.006 mmol), CuI (0.7 mg, 0.004 mmol) in NEt<sub>3</sub> (50 mL). Purification by column chromatography (eluent: CHCl<sub>3</sub>). Yellow solid, C<sub>78</sub>H<sub>90</sub>F<sub>8</sub>O<sub>8</sub>, *M* = 1306.65 g/mol, mp 135 °C, yield: 220 mg (88%), <sup>1</sup>H-NMR (400 MHz, CDCl<sub>3</sub>) δ 7.58 – 7.50 (m, 8H, Ar-*H*), 7.02 (s, 2H, Ar-*H*), 4.51 – 4.41 (m, 2H, –OCH–), 4.34 (dd, <sup>2</sup>*J*(H,H) = 10.0 Hz, <sup>3</sup>*J*(H,H) = 5.1 Hz, 2H, –OCH<sub>2</sub>–), 4.24 (dd, <sup>2</sup>*J*(H,H) = 10.0 Hz, <sup>3</sup>*J*(H,H) = 5.6 Hz, 2H, –OCH<sub>2</sub>–), 4.16 (dd, <sup>2</sup>*J*(H,H) = 8.6 Hz, <sup>3</sup>*J*(H,H) = 6.4 Hz, 2H, –OCH<sub>2</sub>–), 4.04 (t, <sup>3</sup>*J*(H,H) = 6.5 Hz, 4H, –OCH<sub>2</sub>–), 3.96 (dd, <sup>2</sup>*J*(H,H) = 8.6 Hz, <sup>3</sup>*J*(H,H) = 5.6 Hz, 2H, –OCH<sub>2</sub>–), 1.91 – 1.80 (m, 4H, –CH<sub>2</sub>–), 1.61 – 1.17 (m, 56H, –CH<sub>2</sub>–, –CH<sub>3</sub>), 0.86 (t, <sup>3</sup>*J*(H,H) = 6.8 Hz, 6H, –CH<sub>3</sub>) ppm. <sup>19</sup>F-NMR (376 MHz, CDCl<sub>3</sub>) δ -137.53 (td, <sup>3</sup>*J*(F,F) = 10.2 Hz, <sup>4</sup>*J*(F,F) = 3.3 Hz, Ar-*F*), -156.92 (td, <sup>3</sup>*J*(F,F) = 9.8 Hz, <sup>4</sup>*J*(F,F) = 2.8 Hz, Ar-*F*) ppm.

**1,4-Dihexadecyloxy-2,5-bis{4-[2,3,5,6-tetrafluoro-4-(1,2-isopropylidene-*rac*-glycero-3)phenylethynyl]phenylethynyl}benzene (5F16):** Synthesized according to P1 from **4.16** (148 mg, 0.18 mmol), **3F** (155 mg, 0.38 mmol), [Pd(PPh<sub>3</sub>)<sub>4</sub>] (6.2 mg, 0.005 mmol), CuI (0.7 mg, 0.004 mmol) in NEt<sub>3</sub> (50 mL). Purification by column chromatography (eluent: CHCl<sub>3</sub>). Yellow solid, C<sub>82</sub>H<sub>98</sub>F<sub>8</sub>O<sub>8</sub>, *M* = 1362.71 g/mol, mp 89 °C, yield: 240 mg (95%), <sup>1</sup>H-NMR (500 MHz, CDCl<sub>3</sub>) δ 7.59 – 7.52 (m, 8H, Ar-*H*), 7.03 (s, 2H, Ar-*H*), 4.50 – 4.43 (m, 2H, –OCH–), 4.35 (dd, <sup>2</sup>*J*(H,H) = 10.1 Hz, <sup>3</sup>*J*(H,H) = 5.0 Hz, 2H, –OCH<sub>2</sub>–), 4.25 (dd, <sup>2</sup>*J*(H,H) = 10.2 Hz, <sup>3</sup>*J*(H,H) = 5.6 Hz, 2H, –OCH<sub>2</sub>–), 4.18 (dd, <sup>2</sup>*J*(H,H) = 8.6 Hz, <sup>3</sup>*J*(H,H) = 6.4 Hz, 2H, –OCH<sub>2</sub>–), 4.05 (t, <sup>3</sup>*J*(H,H) = 6.4 Hz, 4H, –OCH<sub>2</sub>–), 3.98 (dd, <sup>2</sup>*J*(H,H) = 8.6 Hz, <sup>3</sup>*J*(H,H) = 5.6 Hz, 2H, –OCH<sub>2</sub>–), 1.93 – 1.81 (m, 4H, –CH<sub>2</sub>–), 1.68 – 1.12 (m, 64H, –CH<sub>2</sub>–, –CH<sub>3</sub>), 0.88 (t, <sup>3</sup>*J*(H,H) = 7.1 Hz, 6H, –CH<sub>3</sub>) ppm. <sup>19</sup>F-NMR (470 MHz, CDCl<sub>3</sub>) δ -137.46 – -137.56 (m, Ar-*F*), -156.85 – -156.95 (m, Ar-*F*) ppm.

**1,4-Dioctadecyloxy-2,5-bis{4-[2,3,5,6-tetrafluoro-4-(1,2-isopropylidene-*rac*-glycero-3)phenylethynyl]phenylethynyl}benzene (5F18):** Synthesized according to P1 from **4.18** (152 mg, 0.17 mmol), **3F** (144 mg, 0.36 mmol), [Pd(PPh<sub>3</sub>)<sub>4</sub>] (3.5 mg, 0.005 mmol), CuI (0.6 mg, 0.003 mmol) in NEt<sub>3</sub> (50 mL). Purification by column chromatography (eluent: CHCl<sub>3</sub>). Yellow solid, C<sub>86</sub>H<sub>106</sub>F<sub>8</sub>O<sub>8</sub>, *M* = 1418.78 g/mol, mp 128 °C, yield: 240 mg (95%), <sup>1</sup>H-NMR (500 MHz, CDCl<sub>3</sub>) δ 7.60 – 7.52 (m, 8H, Ar-*H*), 7.03 (s, 2H, Ar-*H*), 4.52 – 4.42 (m, 2H, –OCH–), 4.35 (dd, <sup>2</sup>*J*(H,H) = 10.2 Hz, <sup>3</sup>*J*(H,H) = 5.0 Hz, 2H, –OCH<sub>2</sub>–), 4.25 (dd, <sup>2</sup>*J*(H,H) = 10.1 Hz, <sup>3</sup>*J*(H,H) = 5.6 Hz, 2H, –OCH<sub>2</sub>–), 4.18 (dd, <sup>2</sup>*J*(H,H) = 8.6 Hz, <sup>3</sup>*J*(H,H) = 6.4 Hz, 2H, –OCH<sub>2</sub>–), 4.05 (t, <sup>3</sup>*J*(H,H) = 6.5 Hz, 4H, –OCH<sub>2</sub>–), 3.98 (dd, <sup>2</sup>*J*(H,H) = 8.6 Hz, <sup>3</sup>*J*(H,H) = 5.6 Hz, 2H, –OCH<sub>2</sub>–), 1.92 – 1.81 (m, 4H, –CH<sub>2</sub>–), 1.61 – 1.17 (m, 72H, –CH<sub>2</sub>–, –CH<sub>3</sub>), 0.89 (t, <sup>3</sup>*J*(H,H) = 7.0 Hz, 6H, –CH<sub>3</sub>) ppm. <sup>19</sup>F-NMR (470 MHz, CDCl<sub>3</sub>) δ -137.51 (td, <sup>3</sup>*J*(F,F) = 9.9 Hz, <sup>4</sup>*J*(F,F) = 3.0 Hz, Ar-*F*), -156.90 (td, <sup>3</sup>*J*(F,F) = 9.6 Hz, <sup>4</sup>*J*(F,F) = 2.5 Hz, Ar-*F*) ppm.

## 2.2.5 Synthesis of compounds **H<sub>n</sub>** and **F<sub>n</sub>**

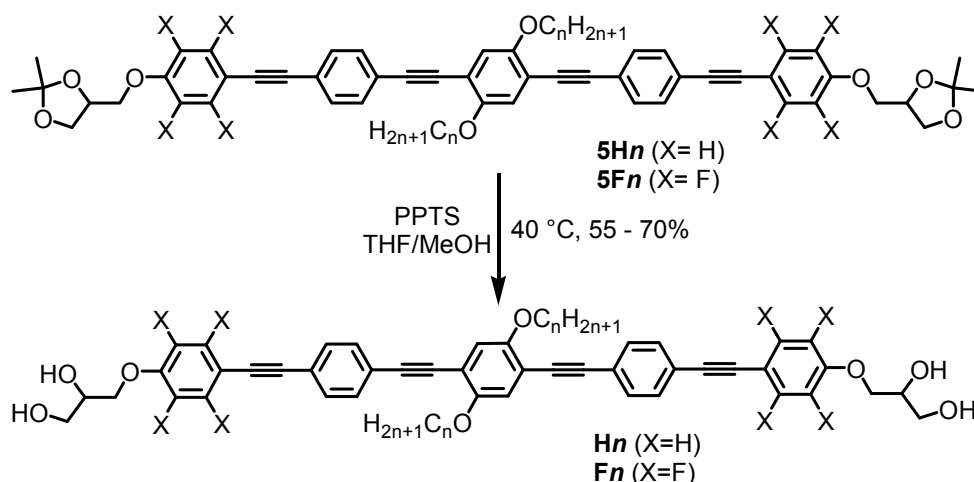

**Scheme S4:** Synthesis of compounds **H<sub>n</sub>** and **F<sub>n</sub>**.

### **1,4-Dibutyloxy-2,5-bis{4-[4-(*rac*-glycero-1)phenylethynyl]phenylethynyl}benzene (**H4**):**

Synthesized according to P3 from **5H4** (250 mg, 0.28 mmol) and PPTS (tip of a spatula) in MeOH/THF (1:1, 30 mL:30 mL). Purification by column chromatography (eluent: CHCl<sub>3</sub>:MeOH = 9:1). Yellow-greenish solid, C<sub>52</sub>H<sub>50</sub>O<sub>8</sub>, *M* = 802.35 g/mol, yield: 183 mg (81%), <sup>1</sup>H-NMR (400 MHz, pyridine-d<sub>5</sub>) δ 7.78 – 7.72 (m, 4H, Ar-*H*), 7.71 – 7.66 (m, 4H, Ar-*H*), 7.66 – 7.62 (m, 4H, Ar-*H*), 7.45 (s, 2H, Ar-*H*), 7.13 – 7.08 (m, 4H, Ar-*H*), 6.94 (br, 2H, -OH), 6.54 (br, 2H, -OH), 4.61 – 4.54 (m, 2H, -OCH-), 4.52 (dd, <sup>2</sup>*J*(H,H) = 9.6 Hz, <sup>3</sup>*J*(H,H) = 4.3 Hz, 2H, -OCH<sub>2</sub>-), 4.43 (dd, <sup>2</sup>*J*(H,H) = 9.6 Hz, <sup>3</sup>*J*(H,H) = 6.3 Hz, 2H, -OCH<sub>2</sub>-), 4.28 – 4.18 (m, 4H, -OCH<sub>2</sub>-), 4.09 (t, <sup>3</sup>*J*(H,H) = 6.4 Hz, 4H, -OCH<sub>2</sub>-), 1.87 – 1.76 (m, 4H, -CH<sub>2</sub>-), 1.66 – 1.51 (m, 4H, -CH<sub>2</sub>-), 0.95 (t, <sup>3</sup>*J*(H,H) = 7.4 Hz, 6H, -CH<sub>3</sub>) ppm. <sup>13</sup>C-NMR (126 MHz, pyridine-d<sub>5</sub>) δ 160.06 (-OCH<sub>2</sub>-), 154.07 (-OCH<sub>2</sub>-), 133.38 (C<sub>Ar</sub>-H), 131.80 (C<sub>Ar</sub>-H), 131.77, 123.94, 117.25, 115.19, 114.96, 114.31, 95.19 (-C≡C-), 92.46 (-C≡C-), 88.89 (-C≡C-), 88.33 (-C≡C-), 71.12 (HOCH<sub>2</sub>-), 70.86, 69.21, 64.04, 31.36 (-CH<sub>2</sub>-), 19.34, 13.76 (-CH<sub>3</sub>) ppm. HRMS (m/z): [M]<sup>+</sup>Li<sup>+</sup>-calcd. for C<sub>52</sub>H<sub>50</sub>O<sub>8</sub>Li, 809.366; found 809.367. Anal. Calcd. for C<sub>52</sub>H<sub>50</sub>O<sub>8</sub>·H<sub>2</sub>O: C, 76.08; H, 6.38. Found: C, 76.21; H, 6.25.

### **1,4-Dihexyloxy-2,5-bis{4-[4-(*rac*-glycero-1)phenylethynyl]phenylethynyl}benzene (**H6**):**

Synthesized according to P3 from **5H6** (371 mg, 0.40 mmol) and PPTS (tip of a spatula) in MeOH/THF (1:1, 30 mL:30 mL). Purification by column chromatography (eluent: CHCl<sub>3</sub>:MeOH = 9:1). Yellow-greenish solid, C<sub>56</sub>H<sub>58</sub>O<sub>8</sub>, *M* = 859.07 g/mol, yield: 100 mg (29%), <sup>1</sup>H-NMR (500 MHz, pyridine-d<sub>5</sub>) δ 7.73 – 7.67 (m, 4H, Ar-*H*), 7.64 – 7.60 (m, 4H, Ar-*H*), 7.60 – 7.56 (m, 4H, Ar-*H*), 7.41 (s, 2H, Ar-*H*), 7.07 – 7.02 (m, 4H, Ar-*H*), 4.56 – 4.48 (m, 2H, -OCH-), 4.45 (dd, <sup>2</sup>*J*(H,H) = 9.6 Hz, <sup>3</sup>*J*(H,H) = 4.3 Hz, 2H, -OCH<sub>2</sub>-), 4.37 (dd, <sup>2</sup>*J*(H,H) = 9.6 Hz, <sup>3</sup>*J*(H,H) = 6.3 Hz, 2H, -OCH<sub>2</sub>-), 4.21 – 4.13 (m, 4H, -OCH<sub>2</sub>-), 4.04 (t, <sup>3</sup>*J*(H,H) = 6.4 Hz, 4H, -OCH<sub>2</sub>-), 1.84 – 1.74 (m, 4H, -CH<sub>2</sub>-), 1.57 – 1.45 (m, 4H, -CH<sub>2</sub>-), 1.30 – 1.18 (m, 8H, -CH<sub>2</sub>-), 0.81 (t, <sup>3</sup>*J*(H,H) = 7.0 Hz, 6H, -CH<sub>3</sub>) ppm. <sup>13</sup>C-NMR (126 MHz, pyridine-d<sub>5</sub>) δ 160.02 (-OCH<sub>2</sub>-), 154.05 (-OCH<sub>2</sub>-), 133.33 (C<sub>Ar</sub>-H), 131.77 (C<sub>Ar</sub>-H), 131.70, 117.21, 115.15, 114.91, 114.27, 95.16 (-C≡C-), 92.42 (-C≡C-), 88.86 (-C≡C-), 88.28

( $-\text{C}\equiv\text{C}-$ ), 71.08 ( $\text{HOCH}_2-$ ), 70.82, 69.48, 63.99, 31.48 ( $-\text{CH}_2-$ ), 29.31, 25.77, 22.62, 13.89 ( $-\text{CH}_3$ ) ppm. HRMS (m/z):  $[\text{M}]+\text{Cl}$ -calcd. for  $\text{C}_{56}\text{H}_{58}\text{O}_8\text{Cl}$ , 893.381; found 893.384.

**1,4-Dioctyloxy-2,5-bis{4-[4-(*rac*-glycero-1)phenylethynyl]phenylethynyl}benzene (H8):** Synthesized according to P3 from **5H8** (250 mg, 0.25 mmol) and PPTS (tip of a spatula) in MeOH/THF (1:1, 30 mL:30 mL). Purification by column chromatography (eluent:  $\text{CHCl}_3:\text{MeOH} = 9:1$ ). Yellow-greenish solid,  $\text{C}_{60}\text{H}_{66}\text{O}_8$ ;  $M = 914.48$  g/mol, yield: 208 mg (90%),  $^1\text{H-NMR}$  (500 MHz, pyridine- $d_5$ )  $\delta$  7.79 – 7.74 (m, 4H, Ar-*H*), 7.71 – 7.67 (m, 4H, Ar-*H*), 7.66 – 7.62 (m, 4H, Ar-*H*), 7.49 (s, 2H, Ar-*H*), 7.12 – 7.08 (m, 4H, Ar-*H*), 4.65 – 4.53 (m, 2H,  $-\text{OCH}-$ ), 4.51 (dd,  $^2J(\text{H,H}) = 9.6$  Hz,  $^3J(\text{H,H}) = 4.3$  Hz, 2H,  $-\text{OCH}_2-$ ), 4.43 (dd,  $^2J(\text{H,H}) = 9.6$  Hz,  $^3J(\text{H,H}) = 6.3$  Hz, 2H,  $-\text{OCH}_2-$ ), 4.27 – 4.19 (m, 4H,  $-\text{OCH}_2-$ ), 4.13 (t,  $^3J(\text{H,H}) = 6.4$  Hz, 4H,  $-\text{OCH}_2-$ ), 1.93 – 1.83 (m, 4H,  $-\text{CH}_2-$ ), 1.62 – 1.56 (m, 4H,  $-\text{CH}_2-$ ), 1.42 – 1.18 (m, 16H,  $-\text{CH}_2-$ ), 0.87 (t,  $^3J(\text{H,H}) = 6.9$  Hz, 6H,  $-\text{CH}_3$ ) ppm.  $^{13}\text{C-NMR}$  (126 MHz, pyridine- $d_5$ )  $\delta$  160.06 ( $-\text{OCH}_2-$ ), 154.11 ( $-\text{OCH}_2-$ ), 133.37 ( $\text{C}_{\text{Ar-H}}$ ), 131.83 ( $\text{C}_{\text{Ar-H}}$ ), 131.75, 117.29, 115.19, 114.95, 114.35, 95.21 ( $-\text{C}\equiv\text{C}-$ ), 92.46 ( $-\text{C}\equiv\text{C}-$ ), 88.92 ( $-\text{C}\equiv\text{C}-$ ), 88.32 ( $-\text{C}\equiv\text{C}-$ ), 71.12 ( $\text{HOCH}_2-$ ), 70.86, 69.55, 64.03, 31.78 ( $-\text{CH}_2-$ ), 29.42, 29.38, 29.35, 26.19, 22.69, 14.03 ( $-\text{CH}_3$ ) ppm. HRMS (m/z):  $[\text{M}]+\text{Li}^+$ -calcd. for  $\text{C}_{60}\text{H}_{66}\text{O}_8$ , 914.476; found 914.476. Anal. Calcd. for  $\text{C}_{60}\text{H}_{66}\text{O}_8 \cdot \text{H}_2\text{O}$ : C, 77.22; H, 7.34. Found: C, 77.68; H, 7.42.

**1,4-Didecyloxy-2,5-bis{4-[4-(*rac*-glycero-1)phenylethynyl]phenylethynyl}benzene (H10):** Synthesized according to P3 from **5H10** (200 mg, 0.20 mmol) and PPTS (tip of a spatula) in MeOH/THF (1:1, 30 mL:30 mL). Purification by column chromatography (eluent:  $\text{CHCl}_3:\text{MeOH} = 9:1$ ). Yellow-greenish solid,  $\text{C}_{64}\text{H}_{74}\text{O}_8$ ,  $M = 970.54$  g/mol, yield: 153 mg (81%),  $^1\text{H-NMR}$  (400 MHz, pyridine- $d_5$ )  $\delta$  7.80 – 7.74 (m, 4H, Ar-*H*), 7.72 – 7.67 (m, 4H, Ar-*H*), 7.67 – 7.62 (m, 4H, Ar-*H*), 7.49 (s, 2H, Ar-*H*), 7.14 – 7.06 (m, 4H, Ar-*H*), 6.94 (br, 2H,  $-\text{OH}$ ), 6.56 (br, 2H,  $-\text{OH}$ ), 4.61 – 4.54 (m, 2H,  $-\text{OCH}-$ ), 4.52 (dd,  $^2J(\text{H,H}) = 9.6$  Hz,  $^3J(\text{H,H}) = 4.3$  Hz, 2H,  $-\text{OCH}_2-$ ), 4.43 (dd,  $^2J(\text{H,H}) = 9.6$  Hz,  $^3J(\text{H,H}) = 6.3$  Hz, 2H,  $-\text{OCH}_2-$ ), 4.28 – 4.19 (m, 4H,  $-\text{OCH}_2-$ ), 4.14 (t,  $^3J(\text{H,H}) = 6.4$  Hz, 4H,  $-\text{OCH}_2-$ ), 1.96 – 1.84 (m, 4H,  $-\text{CH}_2-$ ), 1.68 – 1.55 (m, 4H,  $-\text{CH}_2-$ ), 1.45 – 1.16 (m, 24H,  $-\text{CH}_2-$ ), 0.89 (t,  $^3J(\text{H,H}) = 6.9$  Hz, 6H,  $-\text{CH}_3$ ) ppm.  $^{13}\text{C-NMR}$  (101 MHz, pyridine- $d_5$ )  $\delta$  161.56 ( $-\text{OCH}_2-$ ), 155.62 ( $-\text{OCH}_2-$ ), 134.87 ( $\text{C}_{\text{Ar-H}}$ ), 133.33 ( $\text{C}_{\text{Ar-H}}$ ), 133.25, 118.78, 116.68, 116.46, 115.85, 96.72 ( $-\text{C}\equiv\text{C}-$ ), 93.95 ( $-\text{C}\equiv\text{C}-$ ), 90.41 ( $-\text{C}\equiv\text{C}-$ ), 89.81 ( $-\text{C}\equiv\text{C}-$ ), 72.62 ( $\text{HOCH}_2-$ ), 72.36, 71.06, 69.11, 65.53, 33.39 ( $-\text{CH}_2-$ ), 31.25, 31.11, 30.97, 30.90, 27.73, 27.09, 24.23, 15.57 ( $-\text{CH}_3$ ) ppm. HRMS (m/z):  $[\text{M}]+\text{Li}^+$ -calcd. for  $\text{C}_{64}\text{H}_{74}\text{O}_8\text{Li}$ , 977.554, found 977.546. Anal. Calcd. for  $\text{C}_{64}\text{H}_{74}\text{O}_8 \cdot \text{H}_2\text{O}$ : C, 77.70; H, 7.74. Found: C, 77.65; H, 7.83.

**1,4-Dioctadecyloxy-2,5-bis{4-[4-(*rac*-glycero-1)phenylethynyl]phenylethynyl}benzene (H18):** Synthesized according to P3 from **5H18** (93 mg, 0.07 mmol) and PPTS (tip of a spatula) in MeOH/THF (1:1, 30 mL:30 mL). Purification by column chromatography (eluent:  $\text{CHCl}_3:\text{MeOH} = 9:1$ ). Yellow-greenish solid,  $\text{C}_{80}\text{H}_{106}\text{O}_8$ ,  $M = 1195.71$  g/mol, yield: 20 mg (23%),  $^1\text{H-NMR}$  (500 MHz, pyridine- $d_5$ )  $\delta$  7.74 – 7.69 (m, 4H, Ar-*H*), 7.66 – 7.62 (m, 4H, Ar-*H*), 7.62 – 7.56 (m, 4H, Ar-*H*), 7.43 (s, 2H, Ar-*H*), 7.08 – 7.03 (m, 4H, Ar-*H*), 4.54 – 4.49 (m, 2H,  $-\text{OCH}-$ ), 4.46 (dd,  $^2J(\text{H,H}) = 9.6$  Hz,  $^3J(\text{H,H}) = 4.4$  Hz, 2H,  $-\text{OCH}_2-$ ), 4.37 (dd,  $^2J(\text{H,H}) = 9.6$  Hz,  $^3J(\text{H,H}) = 6.3$  Hz, 2H,  $-\text{OCH}_2-$ ), 4.21 – 4.14 (m, 4H,  $-\text{OCH}_2-$ ), 4.09 (t,  $^3J(\text{H,H}) = 6.3$  Hz, 4H,  $-\text{OCH}_2-$ ), 1.89 – 1.80 (m, 4H,  $-\text{CH}_2-$ ), 1.62 – 1.53 (m, 4H,  $-\text{CH}_2-$ ), 1.40 – 1.09 (m, 56H,  $-\text{CH}_2-$ ), 0.82 (t,  $^3J(\text{H,H}) = 7.0$  Hz, 6H,  $-\text{CH}_3$ ) ppm.  $^{13}\text{C-NMR}$  (126

MHz, pyridine- $d_5$ )  $\delta$  160.03 ( $-\text{OCH}_2-$ ), 154.07 ( $-\text{OCH}_2-$ ), 135.62 ( $C_{\text{Ar}}-\text{H}$ ), 135.51 ( $C_{\text{Ar}}-\text{H}$ ), 135.42, 135.33, 135.22, 135.13, 135.02, 134.80, 133.33, 131.79, 131.72, 123.61, 123.51, 123.42, 123.22, 123.02, 122.78, 119.42, 115.14, 114.91, 103.99, 95.91 ( $-\text{C}\equiv\text{C}-$ ), 95.20 ( $-\text{C}\equiv\text{C}-$ ), 89.11 ( $-\text{C}\equiv\text{C}-$ ), 88.86 ( $-\text{C}\equiv\text{C}-$ ), 71.39 ( $\text{HOCH}_2-$ ), 71.08, 70.83, 64.00, 31.85 ( $-\text{CH}_2-$ ), 29.75, 29.72, 29.66, 29.35, 26.19, 22.67, 14.01 ( $-\text{CH}_3$ ) ppm. HRMS ( $m/z$ ):  $[\text{M}]+\text{Cl}$ -calcd. for  $\text{C}_{80}\text{H}_{106}\text{O}_8\text{Cl}$ , 1229.757; found 1229.759.

**1,4-Dihexyloxy-2,5-bis{4-[2,3,5,6-tetrafluoro-4-(*rac*-glycero-1)phenylethynyl]phenylethynyl}benzene (F6):** Synthesized according to P3 from **5F6** (93 mg, 0.07 mmol) and PPTS (tip of a spatula) in MeOH/THF (1:1, 30 mL:30 mL). Purification by column chromatography (eluent:  $\text{CHCl}_3$ :MeOH = 9:1). Yellow-greenish solid,  $\text{C}_{56}\text{H}_{50}\text{F}_8\text{O}_8$ ,  $M = 1002.34$  g/mol, yield: 175 mg (79%),  $^1\text{H-NMR}$  (400 MHz, pyridine- $d_5$ )  $\delta$  7.80 – 7.75 (m, 4H, Ar- $H$ ), 7.73 – 7.67 (m, 4H, Ar- $H$ ), 7.50 (s, 2H, Ar- $H$ ), 4.94 – 4.86 (m, 2H,  $-\text{OCH}_2-$ ), 4.85 – 4.76 (m, 2H,  $-\text{OCH}_2-$ ), 4.62 – 4.51 (m, 2H,  $-\text{OCH}-$ ), 4.26 – 4.20 (m, 4H,  $-\text{OCH}_2-$ ), 4.12 (t,  $^3J(\text{H,H}) = 6.4$  Hz, 4H,  $-\text{OCH}_2-$ ), 1.92 – 1.80 (m, 4H,  $-\text{CH}_2-$ ), 1.64 – 1.51 (m, 4H,  $-\text{CH}_2-$ ), 1.39 – 1.25 (m, 8H,  $-\text{CH}_2-$ ), 0.88 (t,  $^3J(\text{H,H}) = 7.0$  Hz, 6H,  $-\text{CH}_3$ ) ppm.  $^{19}\text{F-NMR}$  (376 MHz, pyridine- $d_5$ )  $\delta$  -139.28 – -140.26 (m, Ar- $F$ ), -157.71 – -158.43 (m, Ar- $F$ ) ppm.  $^{13}\text{C-NMR}$  (101 MHz, pyridine- $d_5$ )  $\delta$  154.45 ( $-\text{OCH}_2-$ ), 154.45 ( $-\text{OCH}_2-$ ), 142.50 ( $C_{\text{Ar}}-\text{F}$ ), 132.45 ( $C_{\text{Ar}}-\text{F}$ ), 132.18 ( $C_{\text{Ar}}-\text{H}$ ), 125.09, 122.13, 117.56, 114.57, 100.26, 97.55 ( $-\text{C}\equiv\text{C}-$ ), 95.24 ( $-\text{C}\equiv\text{C}-$ ), 89.92 ( $-\text{C}\equiv\text{C}-$ ), 77.88 ( $\text{HOCH}_2-$ ), 72.05, 69.83, 63.84, 31.83 ( $-\text{CH}_2-$ ), 29.64, 26.12, 22.97, 14.24 ( $-\text{CH}_3$ ) ppm. HRMS ( $m/z$ ):  $[\text{M}]+\text{Li}^+$ -calcd. for  $\text{C}_{56}\text{H}_{50}\text{F}_8\text{O}_8\text{Li}$ , 1009.353, found 1009.355. Anal. Calcd. for  $\text{C}_{56}\text{H}_{50}\text{F}_8\text{O}_8\cdot\text{H}_2\text{O}$ : C, 65.83; H, 5.13. Found: C, 65.91; H, 5.06.

**1,4-Dioctyloxy-2,5-bis{4-[2,3,5,6-tetrafluoro-4-(*rac*-glycero-1)phenylethynyl]phenylethynyl}benzene (F8):** Synthesized according to P3 from **5F8** (240 mg, 0.21 mmol) and PPTS (tip of a spatula) in MeOH/THF (1:1, 30 mL:30 mL). Purification by column chromatography (eluent:  $\text{CHCl}_3$ :MeOH = 9:1). Yellow-greenish solid,  $\text{C}_{60}\text{H}_{58}\text{F}_8\text{O}_8$ ,  $M = 1058.40$  g/mol, yield: 160 mg (72%),  $^1\text{H-NMR}$  (400 MHz, pyridine- $d_5$ )  $\delta$  7.84 – 7.79 (m, 4H, Ar- $H$ ), 7.76 – 7.71 (m, 4H, Ar- $H$ ), 7.54 (s, 2H, Ar- $H$ ), 4.97 – 4.90 (m, 2H,  $-\text{OCH}_2-$ ), 4.88 – 4.80 (m, 2H,  $-\text{OCH}_2-$ ), 4.64 – 4.56 (m, 2H,  $-\text{OCH}-$ ), 4.28 – 4.22 (m, 4H,  $-\text{OCH}_2-$ ), 4.18 (t,  $^3J(\text{H,H}) = 6.4$  Hz, 4H,  $-\text{OCH}_2-$ ), 1.99 – 1.86 (m, 4H,  $-\text{CH}_2-$ ), 1.70 – 1.58 (m, 4H,  $-\text{CH}_2-$ ), 1.47 – 1.21 (m, 16H,  $-\text{CH}_2-$ ), 0.91 (t,  $^3J(\text{H,H}) = 6.9$  Hz, 6H,  $-\text{CH}_3$ ) ppm.  $^{19}\text{F-NMR}$  (376 MHz, pyridine- $d_5$ )  $\delta$  -139.86 – -140.01 (m, Ar- $F$ ), -158.02 – -158.18 (m, Ar- $F$ ) ppm.  $^{13}\text{C-NMR}$  (126 MHz, pyridine- $d_5$ )  $\delta$  154.17 ( $-\text{OCH}_2-$ ), 132.14 ( $C_{\text{Ar}}-\text{F}$ ), 131.88 ( $C_{\text{Ar}}-\text{H}$ ), 124.78, 121.83, 117.29, 114.30, 94.95 ( $-\text{C}\equiv\text{C}-$ ), 89.62 ( $-\text{C}\equiv\text{C}-$ ), 79.54 ( $-\text{OHCH}_2-$ ), 77.57, 71.74, 69.56, 63.53, 31.79 ( $-\text{CH}_2-$ ), 29.41, 29.39, 29.36, 26.20, 22.70, 14.01 ( $-\text{CH}_3$ ) ppm. HRMS ( $m/z$ ):  $[\text{M}]+\text{Li}^+$ -calcd. for  $\text{C}_{60}\text{H}_{58}\text{F}_8\text{O}_8\text{Li}$ , 1065.416; found 1065.415. analysis (calcd. for  $\text{C}_{60}\text{H}_{58}\text{F}_8\text{O}_8\cdot\text{H}_2\text{O}$ ): C (66.91, 66.83), H (5.61, 5.50). Anal. Calcd. for  $\text{C}_{60}\text{H}_{58}\text{F}_8\text{O}_8\cdot\text{H}_2\text{O}$ : C, 66.91; H, 5.61. Found: C, 66.83; H, 5.50.

**1,4-Didecyloxy-2,5-bis{4-[2,3,5,6-tetrafluoro-4-(*rac*-glycero-1)phenylethynyl]phenylethynyl}benzene (F10):** Synthesized according to P3 from **5F10** (230 mg, 0.21 mmol) and PPTS (tip of a spatula) in MeOH/THF (1:1, 30 mL:30 mL). Purification by column chromatography (eluent:  $\text{CHCl}_3$ :MeOH = 9:1). Yellow-greenish solid,  $\text{C}_{64}\text{H}_{66}\text{F}_8\text{O}_8$ ,  $M = 1114.46$  g/mol, yield: 181 mg (77%),  $^1\text{H-NMR}$  (400 MHz, pyridine- $d_5$ )  $\delta$  7.82 – 7.76 (m, 4H,

Ar-H), 7.73 – 7.68 (m, 4H, Ar-H), 7.51 (s, 2H, Ar-H), 4.95 – 4.86 (m, 2H, -OCH<sub>2</sub>-), 4.85 – 4.75 (m, 2H, -OCH<sub>2</sub>-), 4.62 – 4.52 (m, 2H, -OCH-), 4.26 – 4.20 (m, 4H, -OCH<sub>2</sub>-), 4.15 (t, <sup>3</sup>J(H,H) = 6.4 Hz, 4H, -OCH<sub>2</sub>-), 1.97 – 1.85 (m, 4H, -CH<sub>2</sub>-), 1.69 – 1.57 (m, 4H, -CH<sub>2</sub>-), 1.46 – 1.19 (m, 20H, -CH<sub>2</sub>-), 0.89 (t, <sup>3</sup>J(H,H) = 6.9 Hz, 6H, -CH<sub>3</sub>) ppm. <sup>19</sup>F-NMR (376 MHz, pyridine-d<sub>5</sub>) δ -139.88 – -140.00 (m, Ar-F), -158.02 – -158.20 (m, Ar-F) ppm. <sup>13</sup>C-NMR (126 MHz, pyridine-d<sub>5</sub>) δ 154.18 (-OCH<sub>2</sub>-), 132.14 (C<sub>Ar</sub>-F), 131.88 (C<sub>Ar</sub>-H), 124.79, 121.83, 117.28, 114.30, 99.94 (-C≡C-), 94.95 (-C≡C-), 89.62 (-C≡C-), 77.60 (HOCH<sub>2</sub>-), 77.57, 77.55, 76.40, 71.74, 69.56, 63.53, 31.89 (-CH<sub>2</sub>-), 29.76, 29.62, 29.47, 29.43, 29.40, 26.24, 22.73, 14.04 (-CH<sub>3</sub>) ppm. HRMS (m/z): [M]<sup>+</sup>Li<sup>+</sup>-calcd. for C<sub>64</sub>H<sub>66</sub>F<sub>8</sub>O<sub>8</sub>Li, 1121.478, found 1121.473. Anal. Calcd. for C<sub>64</sub>H<sub>66</sub>F<sub>8</sub>O<sub>8</sub>·H<sub>2</sub>O: C, 67.83; H, 6.05. Found: C, 67.54; H, 5.94.

**1,4-Didodecyloxy-2,5-bis{4-[2,3,5,6-tetrafluoro-4-(*rac*-glycero-1)phenylethynyl]phenylethynyl}benzene (F12):** Synthesized according to P3 from **5F12** (210 mg, 0.18 mmol) and PPTS (tip of a spatula) in MeOH/THF (1:1, 30 mL:30 mL). Purification by column chromatography (eluent: CHCl<sub>3</sub>:MeOH = 9:1). Yellow-greenish solid, C<sub>68</sub>H<sub>74</sub>F<sub>8</sub>O<sub>8</sub>, *M* = 1170.53 g/mol, yield: 143 mg (72%), <sup>1</sup>H-NMR (400 MHz, pyridine-d<sub>5</sub>) δ 7.85 – 7.74 (m, 4H, Ar-H), 7.75 – 7.66 (m, 4H, Ar-H), 7.51 (s, 2H, Ar-H), 7.13 (d, <sup>3</sup>J(H,H) = 5.1 Hz, 2H, -OH), 6.65 (t, <sup>3</sup>J(H,H) = 5.4 Hz, 2H, -OH), 4.96 – 4.86 (m, 2H, -OCH<sub>2</sub>-), 4.85 – 4.76 (m, 2H, -OCH<sub>2</sub>-), 4.62 – 4.51 (m, 2H, -OCH-), 4.23 (t, <sup>3</sup>J(H,H) = 5.2 Hz, 4H, -OCH<sub>2</sub>-), 4.16 (pt, <sup>3</sup>J(H,H) = 6.1 Hz, 4H, -OCH<sub>2</sub>-), 2.01 – 1.84 (m, 4H, -CH<sub>2</sub>-), 1.71 – 1.58 (m, 4H, -CH<sub>2</sub>-), 1.50 – 1.18 (m, 32H, -CH<sub>2</sub>-), 0.89 (t, <sup>3</sup>J(H,H) = 6.3 Hz, 6H, -CH<sub>3</sub>) ppm. <sup>19</sup>F-NMR (376 MHz, pyridine-d<sub>5</sub>) δ -139.83 – -140.00 (m, Ar-F), -158.02 – -158.19 (m, Ar-F) ppm. <sup>13</sup>C-NMR (126 MHz, pyridine-d<sub>5</sub>) δ 154.88 (-OCH<sub>2</sub>-), 136.25 (C<sub>Ar</sub>-F), 124.35, 117.98, 115.00 (C<sub>Ar</sub>-H), 100.65 (-C≡C-), 95.64 (-C≡C-), 90.32 (-C≡C-), 78.27 (HOCH<sub>2</sub>-), 77.09, 72.44, 70.26, 64.23, 32.61 (-CH<sub>2</sub>-), 30.47, 30.40, 30.38, 30.17, 30.13, 30.11, 26.94, 23.41 (-CH<sub>2</sub>-), 14.73 (-CH<sub>3</sub>) ppm. HRMS (m/z): [M]<sup>+</sup>Li<sup>+</sup>-calcd. for C<sub>68</sub>H<sub>74</sub>F<sub>8</sub>O<sub>8</sub>Li, 1177.541; found 1177.534. Anal. Calcd. for C<sub>68</sub>H<sub>74</sub>F<sub>8</sub>O<sub>8</sub>·2H<sub>2</sub>O: C, 67.65; H, 6.37. Found: C, 67.65; H, 6.51.

**1,4-Ditetradecyloxy-2,5-bis{4-[2,3,5,6-tetrafluoro-4-(*rac*-glycero-1)phenylethynyl]phenylethynyl}benzene (F14):** Synthesized according to P3 from **5F14** (220 mg, 0.17 mmol) and PPTS (tip of a spatula) in MeOH/THF (1:1, 30 mL:30 mL). Purification by column chromatography (eluent: CHCl<sub>3</sub>:MeOH = 9:1). Yellow-greenish solid, C<sub>72</sub>H<sub>82</sub>F<sub>8</sub>O<sub>8</sub>, *M* = 1226.59 g/mol, yield: 154 mg (74%), <sup>1</sup>H-NMR (400 MHz, pyridine-d<sub>5</sub>) δ 7.82 – 7.76 (m, 4H, Ar-H), 7.74 – 7.69 (m, 4H, Ar-H), 7.51 (s, 2H, Ar-H), 4.95 – 4.87 (m, 2H, -OCH<sub>2</sub>-), 4.84 – 4.77 (m, 2H, -OCH<sub>2</sub>-), 4.63 – 4.52 (m, 2H, -OCH-), 4.26 – 4.20 (m, 4H, -OCH<sub>2</sub>-), 4.16 (t, <sup>3</sup>J(H,H) = 6.3 Hz, 4H, -OCH<sub>2</sub>-), 1.98 – 1.85 (m, 4H, -CH<sub>2</sub>-), 1.71 – 1.58 (m, 4H, -CH<sub>2</sub>-), 1.49 – 1.20 (m, 40H, -CH<sub>2</sub>-), 0.88 (t, <sup>3</sup>J(H,H) = 6.9 Hz, 6H, -CH<sub>3</sub>) ppm. <sup>19</sup>F-NMR (376 MHz, pyridine-d<sub>5</sub>) δ -139.83 – -139.99 (m, Ar-F), -158.01 – -158.20 (m, Ar-F) ppm. <sup>13</sup>C-NMR (101 MHz, pyridine-d<sub>5</sub>) δ 152.98 (-OCH<sub>2</sub>-), 148.79 (C<sub>Ar</sub>-F), 130.94 (C<sub>Ar</sub>-H), 130.69, 123.60, 120.63, 116.08, 113.10, 98.76 (-C≡C-), 93.75 (-C≡C-), 88.43 (-C≡C-), 78.34 (HOCH<sub>2</sub>-), 76.38, 75.20, 70.54, 68.36, 62.33, 30.71 (-CH<sub>2</sub>-), 28.60, 28.58, 28.52, 28.50, 28.28, 28.23, 28.21, 25.04, 21.52, 12.84 (-CH<sub>3</sub>). HRMS (m/z): [M]<sup>+</sup>Li<sup>+</sup>-calcd. for C<sub>72</sub>H<sub>82</sub>F<sub>8</sub>O<sub>8</sub>Li, 1233.604, found 1233.605. Anal. Calcd. for C<sub>72</sub>H<sub>82</sub>F<sub>8</sub>O<sub>8</sub>·2H<sub>2</sub>O: C, 68.45; H, 6.86. Found: C, 68.65; H, 6.58.

**1,4-Dihexadecyloxy-2,5-bis{4-[2,3,5,6-tetrafluoro-4-(*rac*-glycero-1)phenylethynyl]-phenylethynyl}benzene (F16):** Synthesized according to P3 from **5F16** (240 mg, 0.17 mmol) and PPTS (tip of a spatula) in MeOH/THF (1:1, 30 mL:30 mL). Purification by column chromatography (eluent: CHCl<sub>3</sub>:MeOH = 9:1). Yellow-greenish solid, C<sub>76</sub>H<sub>90</sub>F<sub>8</sub>O<sub>8</sub>, *M* = 1282.85 g/mol, yield: 181 mg (83%), <sup>1</sup>H-NMR (500 MHz, pyridine-d<sub>5</sub>) δ 7.81 – 7.77 (m, 4H, Ar-*H*), 7.74 – 7.69 (m, 4H, Ar-*H*), 7.51 (s, 2H, Ar-*H*), 4.90 (dd, <sup>2</sup>*J*(H,H) = 10.1 Hz, <sup>3</sup>*J*(H,H) = 4.0 Hz, 2H, -OCH<sub>2</sub>-), 4.80 (dd, <sup>2</sup>*J*(H,H) = 10.1 Hz, <sup>3</sup>*J*(H,H) = 6.3 Hz, 2H, -OCH<sub>2</sub>-), 4.61 – 4.52 (m, 2H, -OCH-), 4.26 – 4.20 (m, 4H), 4.16 (t, <sup>3</sup>*J*(H,H) = 6.4 Hz, 4H, -OCH<sub>2</sub>-), 1.99 – 1.87 (m, 4H, -CH<sub>2</sub>-), 1.71 – 1.59 (m, 4H, -CH<sub>2</sub>-), 1.48 – 1.18 (m, 48H, -CH<sub>2</sub>-), 0.88 (t, <sup>3</sup>*J*(H,H) = 6.9 Hz, 6H, -CH<sub>3</sub>) ppm. <sup>19</sup>F-NMR (470 MHz, pyridine-d<sub>5</sub>) δ -138.65 – -138.77 (m, Ar-*F*), -156.85 – -156.97 (m, Ar-*F*) ppm. <sup>13</sup>C-NMR (101 MHz, pyridine-d<sub>5</sub>) δ 152.98 (-OCH<sub>2</sub>-), 148.78 (-OCH<sub>2</sub>-), 130.94 (C<sub>Ar</sub>-F), 130.69 (C<sub>Ar</sub>-H), 123.60, 120.63, 116.08, 113.10, 98.77 (-C≡C-), 96.05 (-C≡C-), 93.75 (-C≡C-), 88.43 (-C≡C-), 76.38 (HOCH<sub>2</sub>-), 76.35, 75.20, 70.53, 68.36, 62.33, 30.71 (-CH<sub>2</sub>-), 28.61, 28.59, 28.58, 28.51, 28.28, 28.23, 28.20, 25.04, 21.51, 12.84 (-CH<sub>2</sub>-). HRMS (m/z): [M]<sup>+</sup>Li<sup>+</sup>-calcd. for C<sub>76</sub>H<sub>90</sub>F<sub>8</sub>O<sub>8</sub>Li, 1289.666, found 1289.667. Anal. Calcd. for C<sub>76</sub>H<sub>90</sub>F<sub>8</sub>O<sub>8</sub>·H<sub>2</sub>O: C, 70.13; H, 7.12. Found: C, 70.24; H, 7.25.

**1,4-Dioctadecyloxy-2,5-bis{4-[2,3,5,6-tetrafluoro-4-(*rac*-glycero-1)phenylethynyl]phenylethynyl}benzene (F18):** Synthesized according to P3 from **5F18** (240 mg, 0.17 mmol) and PPTS (tip of a spatula) in MeOH/THF (1:1, 30 mL:30 mL). Purification by column chromatography (eluent: CHCl<sub>3</sub>:MeOH = 9:1). Yellow-greenish solid, C<sub>80</sub>H<sub>98</sub>F<sub>8</sub>O<sub>8</sub>, *M* = 1368.76 g/mol, yield: 201 mg (88%), <sup>1</sup>H-NMR (400 MHz, pyridine-d<sub>5</sub>) δ 7.82 – 7.77 (m, 4H, Ar-*H*), 7.75 – 7.68 (m, 4H, Ar-*H*), 7.51 (s, 2H, Ar-*H*), 4.94 – 4.86 (m, 2H, -OCH<sub>2</sub>-), 4.85 – 4.76 (m, 2H, -OCH<sub>2</sub>-), 4.62 – 4.52 (m, 2H, -OCH-), 4.26 – 4.20 (m, 4H, -OCH<sub>2</sub>-), 4.16 (t, <sup>3</sup>*J*(H,H) = 6.3 Hz, 4H, -OCH<sub>2</sub>-), 1.98 – 1.86 (m, 4H, -CH<sub>2</sub>-), 1.71 – 1.59 (m, 4H, -CH<sub>2</sub>-), 1.51 – 1.19 (m, 56H, -CH<sub>2</sub>-), 0.88 (t, <sup>3</sup>*J*(H,H) = 6.9 Hz, 6H, -CH<sub>3</sub>) ppm. <sup>19</sup>F-NMR (376 MHz, pyridine-d<sub>5</sub>) δ -139.81 – -139.99 (m, Ar-*F*), -158.01 – -158.18 (m, Ar-*F*) ppm. <sup>13</sup>C-NMR (101 MHz, pyridine-d<sub>5</sub>) δ 152.98 (-OCH<sub>2</sub>-), 148.79 (-OCH<sub>2</sub>-), 130.95 (C<sub>Ar</sub>-F), 130.69 (C<sub>Ar</sub>-H), 123.60, 120.63, 116.09, 113.11, 93.75 (-C≡C-), 88.43 (-C≡C-), 76.38 (HOCH<sub>2</sub>-), 70.53, 68.36, 62.33, 30.70 (-CH<sub>2</sub>-), 28.60, 28.58, 28.50, 28.27, 28.23, 28.19, 25.04, 21.51, 12.84 (-CH<sub>3</sub>) ppm. HRMS (m/z): [M]<sup>+</sup>Li<sup>+</sup>-calcd. for C<sub>80</sub>H<sub>98</sub>F<sub>8</sub>O<sub>8</sub>Li, 1345.729; found 1345.729. Anal. Calcd. for C<sub>80</sub>H<sub>98</sub>F<sub>8</sub>O<sub>8</sub>·H<sub>2</sub>O: C, 70.77; H, 7.42. Found: C, 70.55; H, 7.11.

### 3. Representative NMR spectra

#### 3.1 NMR spectra of H10

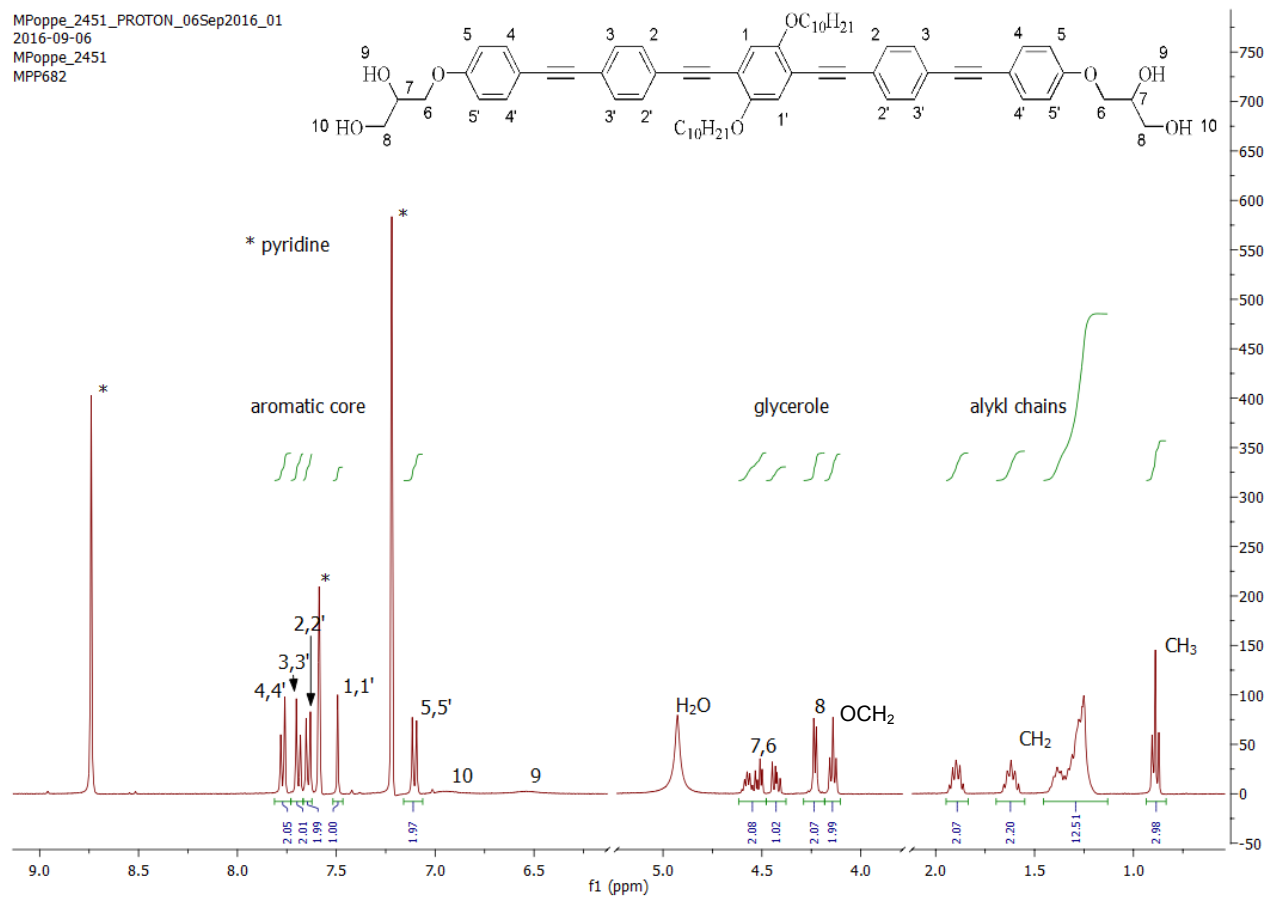

Figure S8: <sup>1</sup>H-NMR spectra of H10 (400 MHz, pyridine-d<sub>5</sub>).

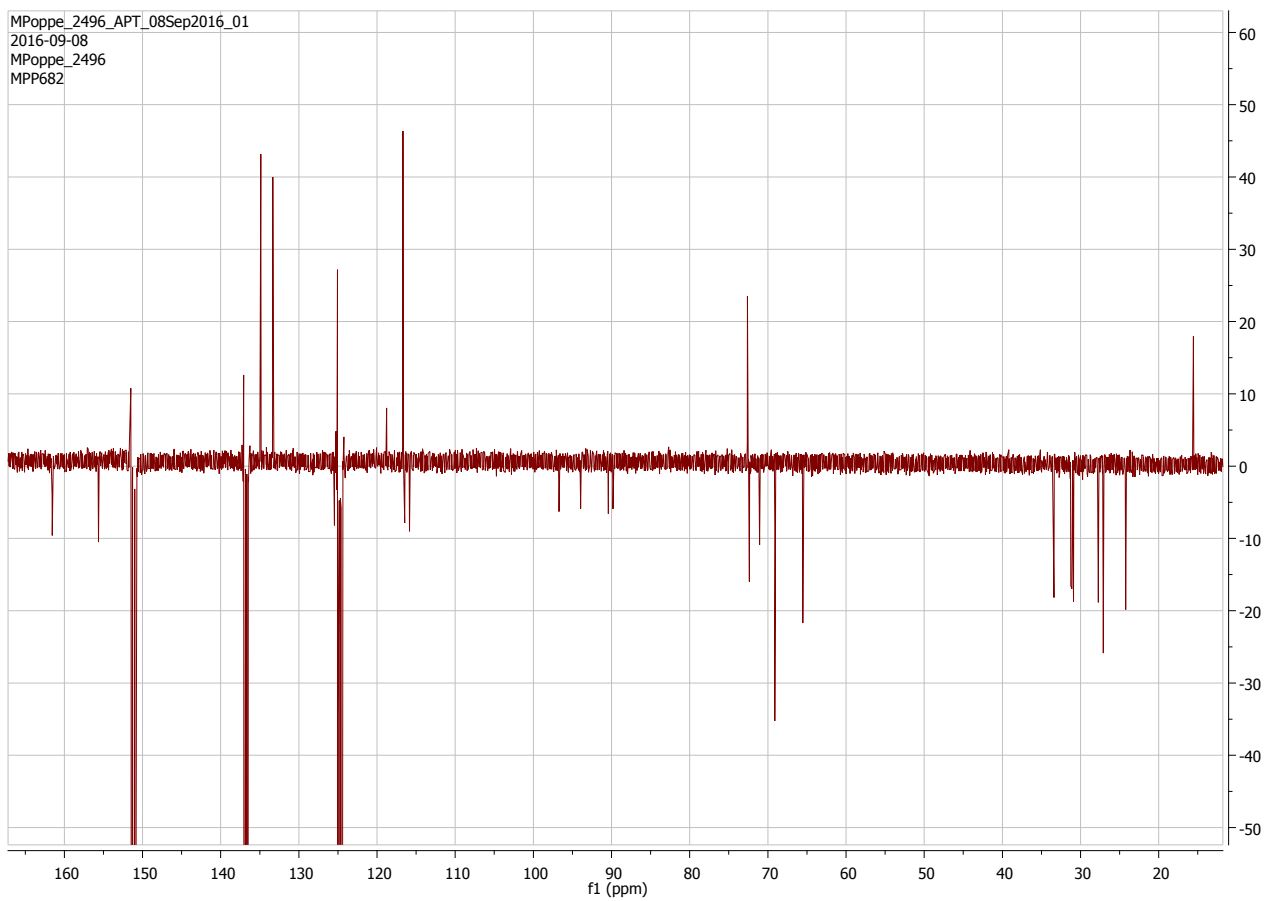

**Figure S9:**  $^{13}\text{C}$ -NMR (APT) spectra of **H10** (101 MHz, pyridine- $d_5$ ).



### 3.2 NMR spectra of F10

MPoppe\_3691-92\_PROTON\_07Jul2015\_01  
MPoppe\_3691-92  
MPP 374

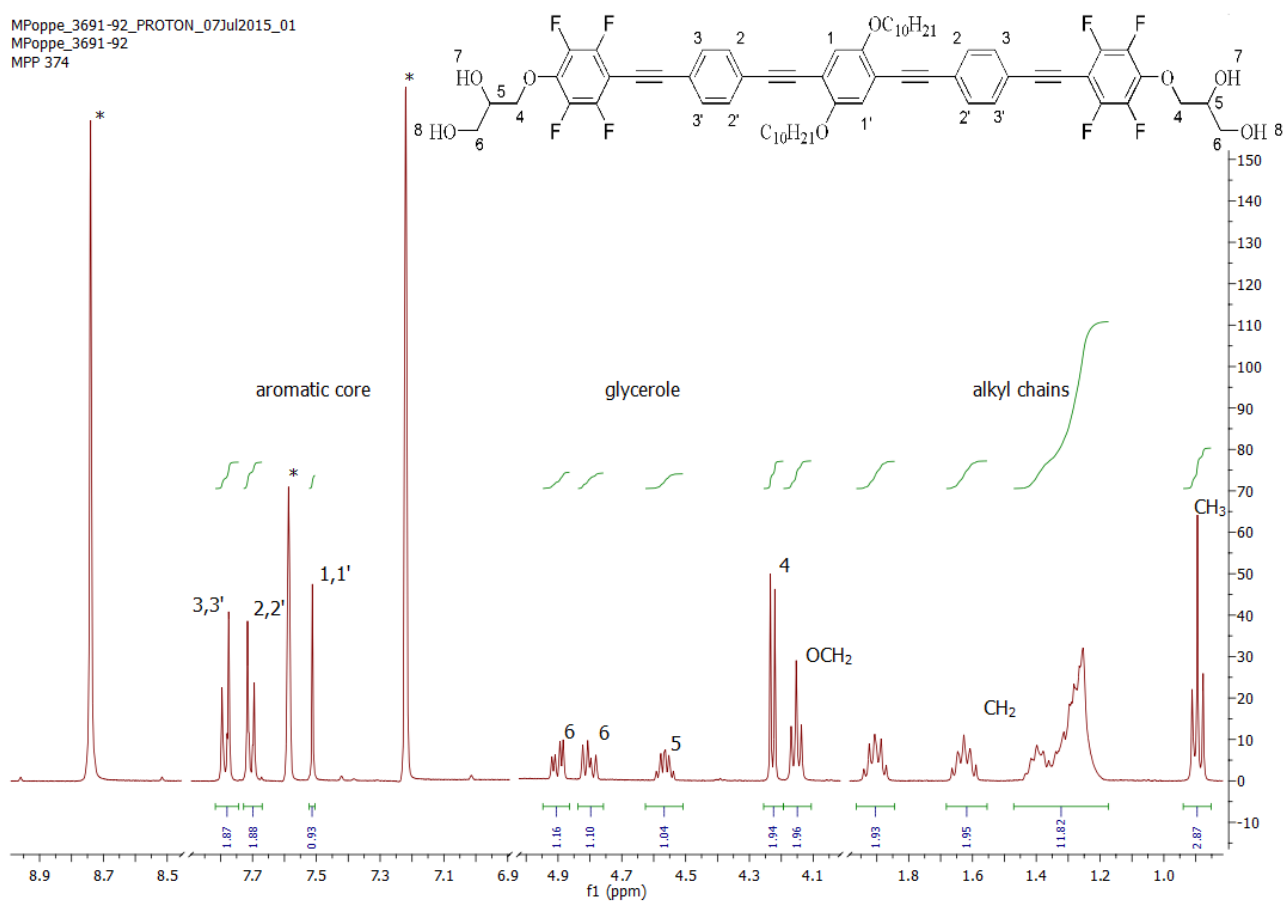

Figure S10: <sup>1</sup>H-NMR spectra of F10 (400 MHz, pyridine-d<sub>5</sub>).

MPoppe\_3691-92\_FLUORINE\_07Jul2015\_01  
MPoppe\_3691-92  
MPP 374

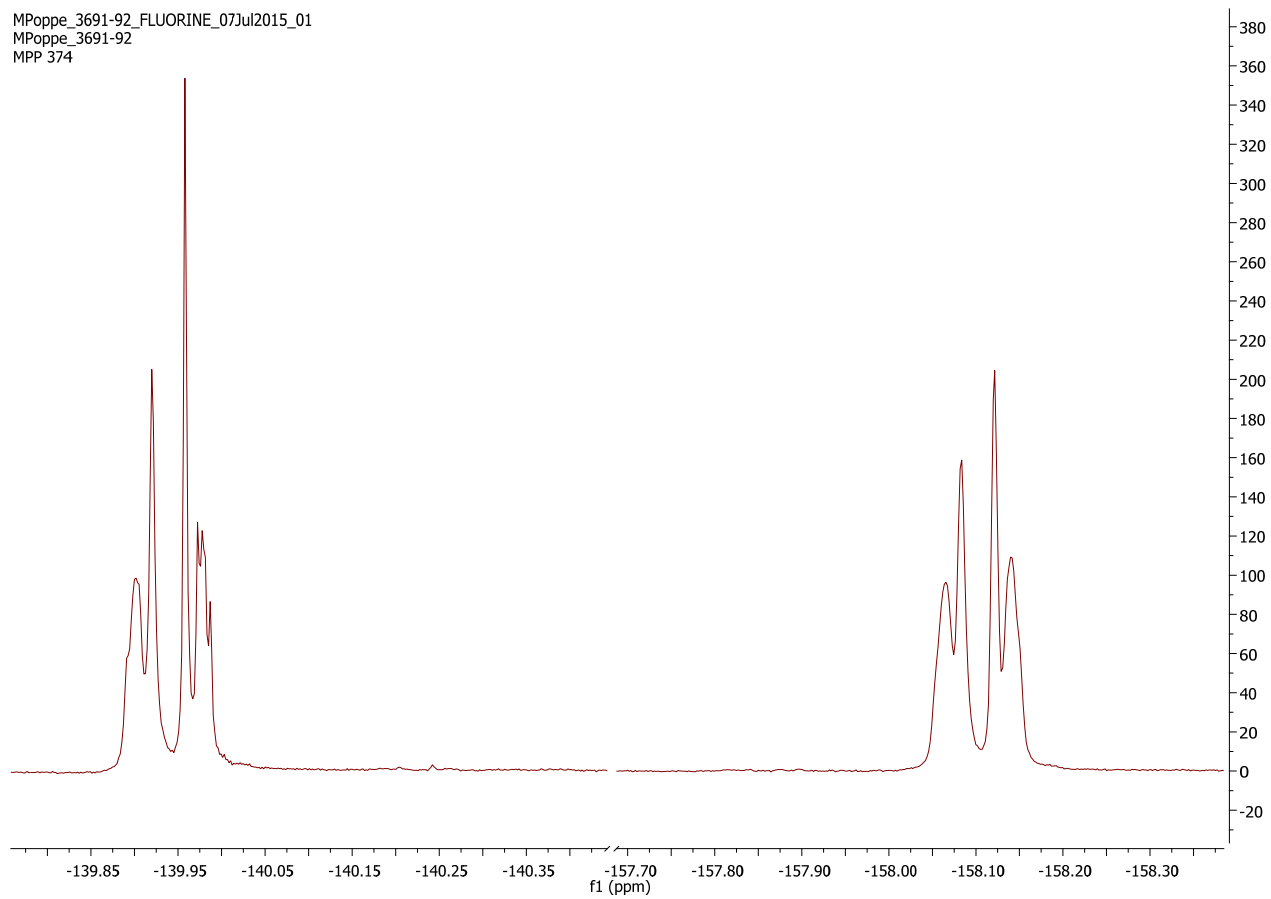

**Figure S11:**  $^{19}\text{F}$ -NMR spectra of F10 (176 MHz, pyridine- $d_5$ ).

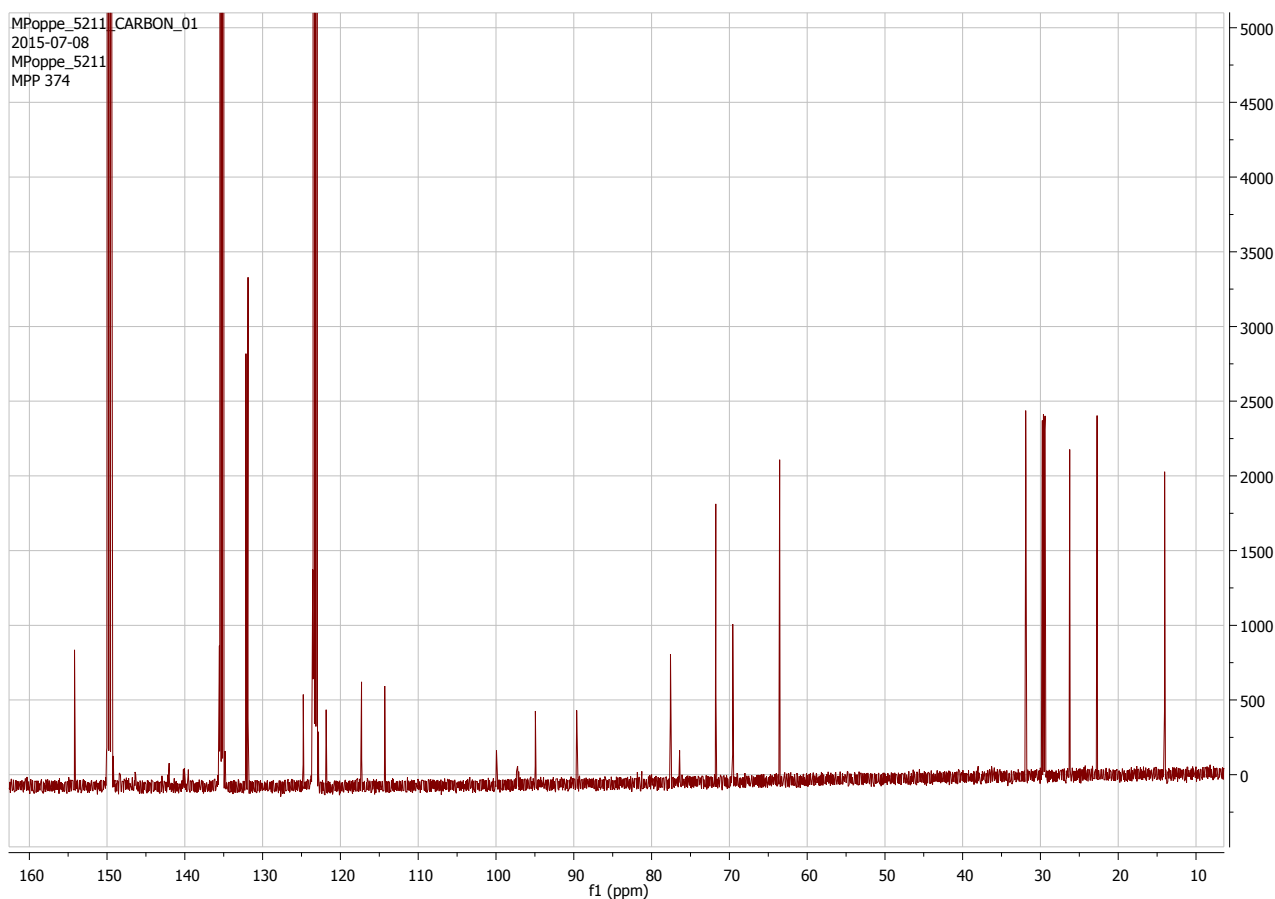

**Figure S12:**  $^{13}\text{C}$ -NMR spectra of **F10** (101 MHz, pyridine- $\text{d}_5$ ).

## 4 References

- <sup>1</sup> M. Poppe, C. Chen, F. Liu, S. Poppe and C. Tschierske, *Chem. Eur. J.* DOI: 10.1002/chem.201700905.
- <sup>2</sup> S. Werner, H. Ebert, B.-D. Lechner, F. Lange, A. Achilles, R. Bärenwald, S. Poppe, A. Blume, K. Saalwächter, C. Tschierske and K. Bacia, *Chem. Eur. J.*, 2015, **21**, 8840-8850.
- <sup>3</sup> A. Immirzi and B. Perini, *Acta Cryst. Sect. A*, 1977, **33**, 216–218.
- <sup>4</sup> A. I. Kitaigorodski, in “Molekülkristalle”, Akademieverlag Berlin, 1979.
- <sup>5</sup> A. H. Schoen, *NASA TN D-5541*, „Infinite Periodic Minimal Surfaces without Self-Intersections“, Electronic Research Centre, Cambridge, Mass. 02139. May, 1970.
- <sup>6</sup> F. Liu, M. Prehm, X.-B. Zeng, C. Tschierske and G. Ungar, *J. Am. Chem. Soc.*, 2014, **136**, 6846-6849.
- <sup>7</sup> K. Sonogashira, Y. Tohda, N. Hagihara, *Tetrahedron Lett.* **1975**, *50*, 4467–4470.
- <sup>8</sup> R. van Rijsbergen, M.-J. Anteunis, A. de Bruyn, *J. Carbohydr. Chem.*, 2006, **2**, 395–404.
- <sup>9</sup> J. Wen, M. Tian, Q. Chen, *J. Fluorine Chem.*, 1994, **68**, 117–120.
